# Supplementary material for: AIBN-initiated direct thiocyanation of benzylic sp3 C–H with N-thiocyanatosaccharin
Source: Royal Society of Chemistry journal article supplement (doi:10.1039/d1cc04302a), 2021-01-01

Supporting Information for

**AIBN-Initiated Direct Thiocyanation of Benzylic  $sp^3$  C–H with *N*-  
Thiocyanatosaccharin**

Di Wu,<sup>a</sup> Yongjie Duan,<sup>a</sup> Kun Liang,<sup>a</sup> Hongquan Yin<sup>a</sup> and Fu-Xue Chen<sup>\*a</sup>

<sup>a</sup>School of chemistry School of Chemistry & Chemical Engineering, Beijing Institute of Technology (Liangxiang Campus). No. 8 Liangxiang East Road Fangshan District, Beijing 102488, China.

## Table of Content

|                                               |    |
|-----------------------------------------------|----|
| <b>1. General Information</b> .....           | 3  |
| <b>2. General procedure</b> .....             | 3  |
| <b>3. Spectral data of the products</b> ..... | 3  |
| <b>4. References</b> .....                    | 9  |
| <b>5. NMR spectra of products</b> .....       | 10 |

## 1. General Information

All reactions were carried out under air atmosphere, unless otherwise stated. All chemicals were purchased from commercial companies. All solvents were used directly.  $^1\text{H}$  NMR spectra were recorded on a Bruker Avance400 (400 MHz) spectrometer, all signals are reported in ppm with the internal chloroform signal at 7.26 ppm as the standard.  $^{13}\text{C}\{^1\text{H}\}$  NMR spectra were recorded on a Bruker Avance400 (100 MHz) spectrometer, all signals are reported in ppm with the internal chloroform signal at 77.0 ppm as the standard. The data is reported as (s = singlet, d = doublet, t = triplet, m = multiplet or unresolved, coupling constant(s) in Hz, integration, assignment). Other analyses were carried out on the following instruments. Infrared spectrometer: Bruker ALPHA FT-IR-Spektrometer. High resolution mass spectrum: AGILENT 7890A/5975C. Melting point detector: Binocular microscope XT4A melting point apparatus (without correct).

## 2. General procedure

1 (1.00 mmol, 5.0 equiv), AIBN (0.04 mmol, 20 mol%) and benzene (1.0 mL) was added to a glass tube, Then, **R3** (0.20 mmol, 1.0 equiv) was added to the system, and the reaction system was continually stirred 4 h at 80 °C. The reaction mixture was purified by column chromatography on silica gel with petroleum ether/ethyl acetate (10:1, v/v) to afford the pure desired product.

## 3. Spectral data of the products

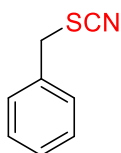

**2a**

(Thiocyanatomethyl)benzene (**2a**)<sup>1</sup> was synthesized following the general procedure: Yellow oil (27 mg, 93% yield). eluent PE/EtOAc (10:1, v/v).  $^1\text{H}$  NMR (400 MHz,  $\text{CDCl}_3$ )  $\delta$ : 7.40 – 7.36 (m, 5H), 4.17 (s, 2H),  $^{13}\text{C}\{^1\text{H}\}$  NMR (100 MHz,  $\text{CDCl}_3$ )  $\delta$ : 134.3, 129.1, 128.9, 128.9, 111.9, 38.3.

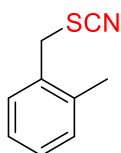

**2b**

1-Methyl-2-(thiocyanatomethyl)benzene (**2b**)<sup>2</sup> was synthesized following the general procedure: Colourless oil (30 mg, 92% yield). eluent PE/EtOAc (10:1, v/v).  $^1\text{H}$  NMR (400 MHz,  $\text{CDCl}_3$ )  $\delta$ : 7.25 – 7.17 (m, 4H), 4.18 (s, 2H), 2.37 (s, 3H),  $^{13}\text{C}\{^1\text{H}\}$  NMR (175 MHz,  $\text{CDCl}_3$ )  $\delta$ : 136.8, 131.9, 131.0, 130.2, 129.3, 126.7, 111.9, 36.6, 19.0.

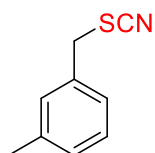

**2c**

1-Methyl-3-(thiocyanatomethyl)benzene (**2c**)<sup>3</sup> was synthesized following the general procedure: colourless oil (33 mg, 100% yield). eluent PE/EtOAc (10:1, v/v).  $^1\text{H}$  NMR (400 MHz,  $\text{CDCl}_3$ )  $\delta$ : 7.25 – 7.11 (m, 4H), 4.09 (s, 2H),

2.33 (s, 3H),  $^{13}\text{C}\{^1\text{H}\}$  NMR (175 MHz,  $\text{CDCl}_3$ )  $\delta$ : 138.9, 134.1, 129.7, 129.6, 129.0, 126.0, 112.0, 38.4, 21.3.

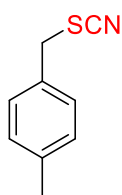

**2d**

1-Methyl-4-(thiocyanatomethyl)benzene (**2d**)<sup>1</sup> was synthesized following the general procedure: Colourless oil (32 mg, 98% yield). eluent PE/EtOAc (10:1, v/v).  $^1\text{H}$  NMR (400 MHz,  $\text{CDCl}_3$ )  $\delta$ : 7.26 (d,  $J = 8.0$  Hz, 2H), 7.19 (d,  $J = 8.0$  Hz, 2H), 4.14 (s, 2H), 2.36 (s, 3H),  $^{13}\text{C}\{^1\text{H}\}$  NMR (175 MHz,  $\text{CDCl}_3$ )  $\delta$ : 138.9, 131.2, 129.8, 128.9, 112.1, 38.2, 21.2.

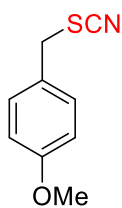

**2e**

1-Methoxy-4-(thiocyanatomethyl)benzene (**2e**)<sup>1</sup> was synthesized following the general procedure: Yellow oil (36 mg, 100% yield). eluent PE/EtOAc (10:1, v/v).  $^1\text{H}$  NMR (400 MHz,  $\text{CDCl}_3$ )  $\delta$ : 7.29 (d,  $J = 8.4$  Hz, 2H), 6.90 (d,  $J = 8.4$  Hz, 2H), 4.15 (s, 2H), 3.82 (s,  $J = 3$  Hz),  $^{13}\text{C}\{^1\text{H}\}$  NMR (100 MHz,  $\text{CDCl}_3$ )  $\delta$ : 160.0, 130.3, 128.2, 114.5, 112.2, 55.3, 38.2.

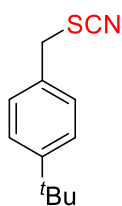

**2f**

1-(*tert*-Butyl)-4-(thiocyanatomethyl)benzene (**2f**)<sup>4</sup> was synthesized following the general procedure: Colourless oil (38 mg, 93% yield). eluent PE/EtOAc (10:1, v/v).  $^1\text{H}$  NMR (400 MHz,  $\text{CDCl}_3$ )  $\delta$ : 7.41 (d,  $J = 8.4$  Hz, 2H), 7.30 (d,  $J = 8.4$  Hz, 2H), 4.16 (s, 2H), 1.33 (s, 9H),  $^{13}\text{C}\{^1\text{H}\}$  NMR (175 MHz,  $\text{CDCl}_3$ )  $\delta$ : 152.0, 131.2, 128.7, 126.1, 38.2, 34.7, 31.2.

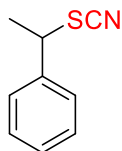

**2g**

(1-Thiocyanoethyl)benzene (**2g**)<sup>1</sup> was synthesized following the general procedure: Colourless oil (33 mg, 100% yield). eluent PE/EtOAc (10:1, v/v).  $^1\text{H}$  NMR (400 MHz,  $\text{CDCl}_3$ )  $\delta$ : 7.40 – 7.35 (m, 5H), 6.61 (q,  $J = 6.8$  Hz, 1H), 1.89 (d,  $J = 6.8$  Hz, 3H),  $^{13}\text{C}\{^1\text{H}\}$  NMR (175 MHz,  $\text{CDCl}_3$ )  $\delta$ : 139.0, 129.0, 128.9, 127.0, 111.7, 48.4, 21.9.

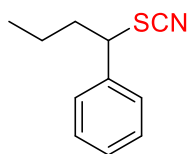

**2h**

(1-Thiocyanatobutyl)benzene (**2h**)<sup>5</sup> was synthesized following the general procedure: Colourless oil (36 mg, 94% yield). eluent PE/EtOAc (10:1, v/v). <sup>1</sup>H NMR (400 MHz, CDCl<sub>3</sub>) δ: 7.41 – 7.33 (m, 5H), 4.35 (t, *J* = 7.6 Hz, 1H), 2.17 – 2.11 (m, 2H), 1.45 – 1.29 (m, 2H), 0.95 (t, *J* = 7.2 Hz, 3H). <sup>13</sup>C{<sup>1</sup>H} NMR (175 MHz, CDCl<sub>3</sub>) δ: 138.3, 129.0, 128.8, 127.4, 111.7, 53.4, 37.7, 20.6, 13.4.

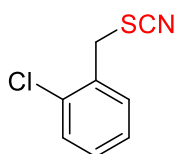

**2i**

1-Chloro-2-(thiocyanatomethyl)benzene (**2i**)<sup>2</sup> was synthesized following the general procedure: Colourless oil (14 mg, 38% yield). eluent PE/EtOAc (10:1, v/v). <sup>1</sup>H NMR (400 MHz, CDCl<sub>3</sub>) δ: 7.46 – 7.40 (m, 2H), 7.36 – 7.29 (m, 2H), 4.25 (s, 2H), <sup>13</sup>C{<sup>1</sup>H} NMR (175 MHz, CDCl<sub>3</sub>) δ: 134.2, 132.3, 131.1, 130.5, 130.1, 127.5, 111.8, 36.2.

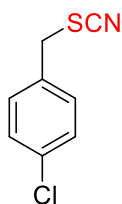

**2j**

1-Chloro-4-(thiocyanatomethyl)benzene (**2j**)<sup>2</sup> was synthesized following the general procedure: Yellow oil (19 mg, 52% yield). eluent PE/EtOAc (10:1, v/v). <sup>1</sup>H NMR (400 MHz, CDCl<sub>3</sub>) δ: 7.37 (d, *J* = 8.8 Hz, 2H), 7.30 (d, *J* = 8.8 Hz, 2H), 4.12 (s, 2H), <sup>13</sup>C{<sup>1</sup>H} NMR (100 MHz, CDCl<sub>3</sub>) δ: 135.0, 132.9, 130.3, 129.4, 111.5, 37.6.

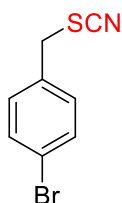

**2k**

1-Bromo-4-(thiocyanatomethyl)benzene (**2k**)<sup>2</sup> was synthesized following the general procedure: colourless oil (30 mg, 66% yield). eluent PE/EtOAc (10:1, v/v). <sup>1</sup>H NMR (400 MHz, CDCl<sub>3</sub>) δ: 7.53 (d, *J* = 8.4 Hz, 2H), 7.24 (d, *J* = 8.4 Hz, 2H), 4.10 (s, 2H), <sup>13</sup>C{<sup>1</sup>H} NMR (175 MHz, CDCl<sub>3</sub>) δ: 133.4, 132.3, 130.5, 123.1, 111.5, 37.6.

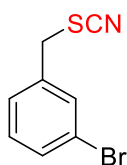

**2l**

1-Bromo-3-(thiocyanatomethyl)benzene (**2l**)<sup>6</sup> was synthesized following the general procedure: Colourless oil (21 mg, 46% yield). eluent PE/EtOAc (10:1, v/v). <sup>1</sup>H NMR (400 MHz, CDCl<sub>3</sub>) δ: 7.54 – 7.52 (m, 2H), 7.35 – 7.28 (m, 2H), 4.13 (s, 2H), <sup>13</sup>C{<sup>1</sup>H} NMR (175 MHz, CDCl<sub>3</sub>) δ: 136.5, 132.1, 131.9, 127.6, 123.0, 111.4, 37.4.

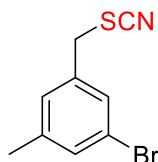

**2m**

1-Bromo-3-methyl-5-(thiocyanatomethyl)benzene (**2m**) was synthesized following the general procedure: White solid, mp. 50 – 52 °C, (44 mg, 91% yield). eluent PE/EtOAc (10:1, v/v). <sup>1</sup>H NMR (400 MHz, CDCl<sub>3</sub>) δ: 7.33 (s, 1H), 7.31 (s, 1H), 7.10 (s, 1H), 4.07 (s, 2H), 2.35 (s, 3H), <sup>13</sup>C{<sup>1</sup>H} NMR (175 MHz, CDCl<sub>3</sub>) δ: 141.0, 136.1, 132.7, 128.9, 122.7, 111.5, 37.5, 21.1. IR (KBr): 2916, 2152 (SCN), 1597, 1566, 1442, 1257 cm<sup>-1</sup>. HRMS (APCI) m/z calcd C<sub>9</sub>H<sub>9</sub>BrNS for [M + H]<sup>+</sup>: 241.9634, found: 241.9634.

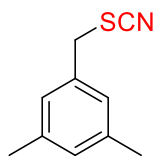

**2n**

1,3-Dimethyl-5-(thiocyanatomethyl)benzene (**2n**) was synthesized following the general procedure: White solid, mp. 47 – 49 °C, (35 mg, 99% yield). eluent PE/EtOAc (10:1, v/v). <sup>1</sup>H NMR (400 MHz, CDCl<sub>3</sub>) δ: 6.99 (s, 1H), 6.97 (s, 2H), 4.11 (s, 2H), 2.33 (s, 6H), <sup>13</sup>C{<sup>1</sup>H} NMR (175 MHz, CDCl<sub>3</sub>) δ: 138.8, 134.0, 130.6, 126.7, 112.2, 38.4, 21.2. IR (KBr): 2916, 2152 (SCN), 1604, 1466 cm<sup>-1</sup>. HRMS (APCI) m/z calcd C<sub>10</sub>H<sub>12</sub>NS for [M + H]<sup>+</sup>: 178.0685, found 178.0678.

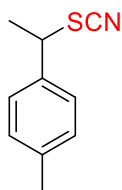

**2o**

1-Methyl-4-(1-thiocyanatoethyl)benzene (**2o**)<sup>7</sup> was synthesized following the general procedure: Colourless oil (31 mg, 88% yield). eluent PE/EtOAc (10:1, v/v). <sup>1</sup>H NMR (400 MHz, CDCl<sub>3</sub>) δ: 7.28 (d, *J* = 8.0 Hz, 2H), 7.20 (d, *J* = 8.0 Hz, 2H), 4.60 (q, *J* = 7.2 Hz, 1H), 2.36 (s, 3H), 1.87 (d, *J* = 7.2 Hz, 3H), <sup>13</sup>C{<sup>1</sup>H} NMR (175 MHz, CDCl<sub>3</sub>) δ: 138.9, 136.0, 129.7, 126.9, 111.9, 48.4, 22.0, 21.1.

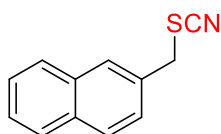

**2p**

2-(Thiocyanatomethyl)naphthalene (**2p**)<sup>8</sup> was synthesized following the general procedure: White solid, mp. 96 – 98 °C, (30 mg, 75% yield). eluent PE/EtOAc (10:1, v/v). <sup>1</sup>H NMR (400 MHz, CDCl<sub>3</sub>) δ: 7.89 – 7.82 (m, 4H), 7.55 – 7.52 (m, 2H), 7.45 (dd, *J* = 8.4, 1.6 Hz, 1H), 4.32 (s, 2H), <sup>13</sup>C{<sup>1</sup>H} NMR (175 MHz, CDCl<sub>3</sub>) δ: 133.1, 133.1, 131.5, 129.2, 128.3, 128.0, 127.7, 126.8, 126.7, 126.0, 111.9, 38.7.

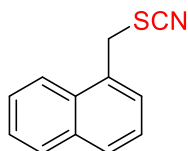

**2q**

1-(Thiocyanatomethyl)naphthalene (**2q**)<sup>9</sup> was synthesized following the general procedure: White solid, mp. 81 – 83 °C, (33 mg, 83% yield). eluent PE/EtOAc (10:1, v/v). <sup>1</sup>H NMR (400 MHz, CDCl<sub>3</sub>) δ: 7.98 – 7.88 (m, 3H), 7.65 – 7.45 (m, 4H), 4.66 (s, 2H), <sup>13</sup>C{<sup>1</sup>H} NMR (175 MHz, CDCl<sub>3</sub>) δ: 134.0, 130.6, 130.2, 129.4, 129.2, 128.6, 127.0, 126.3, 125.3, 122.7, 112.0, 36.4.

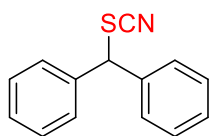

**2r**

(Thiocyanatomethylene)dibenzene (**2r**)<sup>9</sup> was synthesized following the general procedure: Colourless oil (36 mg, 80% yield). eluent PE/EtOAc (10:1, v/v). <sup>1</sup>H NMR (400 MHz, CDCl<sub>3</sub>) δ: 7.43 – 7.33 (m, 10H), 5.83 (s, 1H), <sup>13</sup>C{<sup>1</sup>H} NMR (175 MHz, CDCl<sub>3</sub>) δ: 137.5, 129.1, 128.8, 128.2, 111.7, 57.4.

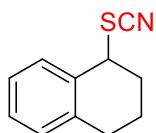

**2s**

1-Thiocyanato-1,2,3,4-tetrahydronaphthalene (**2s**) was synthesized following the general procedure: Colourless oil (37 mg, 98% yield). eluent PE/EtOAc (10:1, v/v). <sup>1</sup>H NMR (400 MHz, CDCl<sub>3</sub>) δ: 7.33 (d, *J* = 7.6 Hz, 1H), 7.25 – 7.18 (m, 2H), 7.12 (d, *J* = 8.4 Hz, 1H), 4.91 (t, *J* = 3.6 Hz, 1H), 2.92 – 2.75 (m, 2H), 2.43 – 1.91 (m, 4H). <sup>13</sup>C{<sup>1</sup>H} NMR (100 MHz, CDCl<sub>3</sub>) δ: 137.9, 131.5, 130.3, 129.7, 128.8, 126.4, 112.4, 49.7, 29.7, 28.6, 18.2. IR (KBr): 2931, 2145 (SCN), 1489, 1450, 1265 cm<sup>-1</sup>. HRMS (APCI) *m/z* calcd C<sub>11</sub>H<sub>12</sub>NS for [M + H]<sup>+</sup>: 190.0685, found 190.0676.

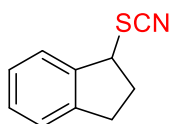

**2t**

1-Thiocyanato-2,3-dihydro-1H-indene (**2t**) was synthesized following the general procedure: Colourless oil (32 mg, 91% yield). eluent PE/EtOAc (10:1, v/v). <sup>1</sup>H NMR (400 MHz, CDCl<sub>3</sub>) δ: 7.43 (d, *J* = 7.2 Hz, 1H), 7.31 – 7.25 (m,

3H), 4.93 (dd,  $J = 7.2, 2.8$  Hz, 1H), 3.24 – 3.16 (m, 1H), 3.00 – 2.93 (m, 1H), 2.71 – 2.62 (m, 1H), 2.43 – 2.36 (m, 1H).  $^{13}\text{C}\{^1\text{H}\}$  NMR (100 MHz,  $\text{CDCl}_3$ )  $\delta$ : 143.8, 139.4, 129.4, 127.2, 125.1, 124.9, 112.2, 53.3, 34.1, 30.4. IR (KBr): 2939, 2144 (SCN), 1465, 1319  $\text{cm}^{-1}$ . HRMS (APCI)  $m/z$  calcd  $\text{C}_{10}\text{H}_{10}\text{NS}$  for  $[\text{M} + \text{H}]^+$ : 176.0528, found 176.0524.

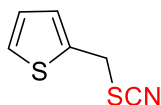

**2u**

2-(Thiocyanatomethyl)thiophene (**2u**)<sup>7</sup> was synthesized following the general procedure: Yellow oil (29 mg, 94% yield). eluent PE/EtOAc (10:1, v/v).  $^1\text{H}$  NMR (400 MHz,  $\text{CDCl}_3$ )  $\delta$ : 7.34 (dd,  $J = 5.2, 0.8$  Hz, 1H), 7.14 (d,  $J = 3.2$  Hz, 1H), 6.99 (dd,  $J = 5.2, 3.2$  Hz, 1H), 4.42 (s, 2H).  $^{13}\text{C}\{^1\text{H}\}$  NMR (100 MHz,  $\text{CDCl}_3$ )  $\delta$ : 136.0, 128.7, 127.4, 127.3, 111.6, 33.2.

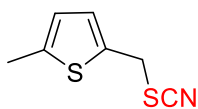

**2v**

2-Methyl-5-(thiocyanatomethyl)thiophene (**2v**) was synthesized following the general procedure: Yellow oil (33 mg, 98% yield). eluent PE/EtOAc (10:1, v/v).  $^1\text{H}$  NMR (400 MHz,  $\text{CDCl}_3$ )  $\delta$ : 6.91 (d,  $J = 3.2$  Hz, 1H), 6.62 (d,  $J = 3.2$  Hz, 1H), 4.35 (s, 2H), 2.47 (s, 3H),  $^{13}\text{C}\{^1\text{H}\}$  NMR (100 MHz,  $\text{CDCl}_3$ )  $\delta$ : 142.3, 133.5, 128.8, 125.4, 111.8, 33.8, 15.4. IR (KBr): 2973, 2912, 2152 (SCN), 1666, 1427, 1249  $\text{cm}^{-1}$ . HRMS (APCI)  $m/z$  calcd  $\text{C}_7\text{H}_8\text{NS}_2$  for  $[\text{M} + \text{H}]^+$ : 170.0093, found 170.0085.

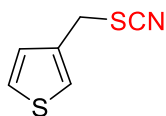

**2w**

3-(Thiocyanatomethyl)thiophene (**2w**) was synthesized following the general procedure: Yellow oil (28 mg, 90% yield). eluent PE/EtOAc (10:1, v/v).  $^1\text{H}$  NMR (400 MHz,  $\text{CDCl}_3$ )  $\delta$ : 7.38 – 7.33 (m, 2H), 7.11 (dd,  $J = 4.8, 1.2$  Hz, 1H), 4.22 (s, 2H).  $^{13}\text{C}\{^1\text{H}\}$  NMR (100 MHz,  $\text{CDCl}_3$ )  $\delta$ : 134.4, 127.4, 127.3, 125.1, 112.0, 32.9. IR (KBr): 2970, 2923, 2154 (SCN), 1667, 1521, 1420, 1250  $\text{cm}^{-1}$ . HRMS (APCI)  $m/z$  calcd  $\text{C}_6\text{H}_6\text{NS}_2$  for  $[\text{M} + \text{H}]^+$ : 155.9936, found 155.9932.

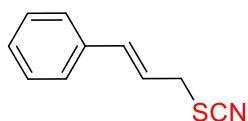

**2x**

(E)-3-(thiocyanatoprop-1-en-1-yl)benzene (**2x**)<sup>10</sup> was synthesized following the general procedure: Yellow oil (33 mg, 94%). eluent PE/EtOAc (10:1, v/v).  $^1\text{H}$  NMR (400 MHz,  $\text{CDCl}_3$ )  $\delta$ : 7.42 – 7.30 (m, 5H), 6.70 (d,  $J = 15.6$  Hz, 1H), 6.30 – 6.25 (m, 1H), 3.76 (d,  $J = 7.2$  Hz, 2H).  $^{13}\text{C}\{^1\text{H}\}$  NMR (100 MHz,  $\text{CDCl}_3$ )  $\delta$ : 136.5, 135.4, 128.7, 12.6, 126.8, 121.2, 111.8, 36.9.

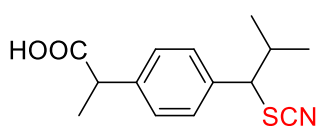

**2y**



2-(4-(2-methyl-1-thiocyanatopropyl)phenyl)propanoic acid (**2y**) was synthesized following the general procedure: Colourless oil (46 mg, 87%). eluent PE/EtOAc (2:1, v/v).  $^1\text{H}$  NMR (400 MHz,  $\text{CDCl}_3$ )  $\delta$ : 7.33 (d,  $J = 8.4$  Hz, 2H), 7.26 (d,  $J = 8.4$  Hz, 2H), 4.06 (d,  $J = 9.2$  Hz, 1H), 3.75 (q,  $J = 7.2$  Hz, 1H), 2.38 – 2.30 (m, 1H), 1.52 (d,  $J = 7.2$  Hz, 3H), 1.17 (d,  $J = 7.2$  Hz, 3H), 0.89 (d,  $J = 6.4$  Hz, 3H).  $^{13}\text{C}\{^1\text{H}\}$  NMR (100 MHz,  $\text{CDCl}_3$ )  $\delta$ : 180.1, 140.0, 137.6, 128.1, 128.0, 111.9, 61.4, 44.9, 33.5, 21.0, 20.5, 18.0. IR (KBr): 2970, 2931, 2152, 1705, 1512, 1458, 1226  $\text{cm}^{-1}$ . HRMS (APCI)  $m/z$  calcd  $\text{C}_{14}\text{H}_{16}\text{NO}_2\text{S}$  for  $[\text{M} - \text{H}]^-$ : 262.0907, found 262.0915.

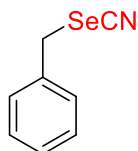

**2z**

(Selenocyanatomethyl)benzene (**2z**)<sup>11</sup> was synthesized following the general procedure: Yellow oil (23 mg, 58% yield). eluent PE/EtOAc (10:1, v/v).  $^1\text{H}$  NMR (400 MHz,  $\text{CDCl}_3$ )  $\delta$ : 7.38 – 7.32 (m, 5H), 4.32 (s, 2H).  $^{13}\text{C}\{^1\text{H}\}$  NMR (100 MHz,  $\text{CDCl}_3$ )  $\delta$ : 135.3, 129.1, 129.0, 128.7, 101.8, 32.8.

#### 4. References

1. D. J. Bound, B. K. Bettadaiah and P. Srinivas, Microwave-assisted synthesis of alkyl thiocyanates. *Synth. Commun.* 2013, **43**, 1138.
2. G. Aghapour and A. Asgharzadeh, Chlorodiphenylphosphine as highly selective and efficient reagent for the conversion of alcohols, tetrahydropyranyl and silyl ethers to thiocyanates and isothiocyanates. *Phosphorus Sulfur* 2014, **189**, 796.
3. A. R. Kiasat and S. Nazari,  $\beta$ -Cyclodextrin based polyurethane as eco-friendly polymeric phase transfer catalyst in nucleophilic substitution reactions of benzyl halides in water: an efficient route to synthesis of benzyl thiocyanates and acetates. *Catal. Sci. Technol.* 2012, **2**, 1056.
4. W. Guo, W. Tan, M. Zhao, L. Zheng, K. Tao, D. Chen and X. Fan, Direct photocatalytic S-H bond cyanation with green “CN” source. *J. Org. Chem.* 2018, **12**, 6580.
5. M. Hideyoshi, N. Yuichi and S. Mitsuru, Oxalic acid-catalyzed reaction of alcohols with NaSCN: the effects of additives NaI and  $\text{I}_2$ . *Chem. Lett.* 2006, **35**, 1262.
6. S. Awasthi, A. Narasimha and K. Ganesan, An environmental-benign approach for the synthesis of alkylthiocyanates. *J. Sulfur. Chem.* 2009, **30**, 513.
7. G. Zhang, L. Xuan, Y. Zhao and C. Ding, Sulfuryl fluoride promoted thiocyanation of alcohols: a practical method for preparing thiocyanates. *Synlett* 2020, **31**, 1413.
8. H. M. Meshram, P. B. Thakur, B. M. Babu and V. M. Bangade, A convenient, rapid, and general synthesis of  $\alpha$ -oxo thiocyanates using clay supported ammonium thiocyanate. *Tetrahedron Lett.* 2012, **53**, 1780.
9. M. A. Karimi Zarchi, Polymer-supported thiocyanate as new, versatile and efficient polymeric reagent for conversion of alkyl halides to corresponding alkyl thiocyanates under mild conditions. *J. Chin. Chem. Soc.* 2007, **54**, 1299.
10. N. Iranpoor, H. Firouzabadi and H. Shaterian, Efficient conversion of silyl ethers to thiocyanates with  $\text{Ph}_3\text{P}(\text{SCN})_2$ . *Synlett* 2000, 65.
11. P. Nikolaienko, M. Rueping, Trifluoromethylselenolation of aryldiazonium salts: a mild and convenient copper-catalyzed procedure for the introduction of the  $\text{SeCF}_3$  group. *Chem. Eur. J.* 2016, **22**, 2620.

## 5. NMR spectra of products

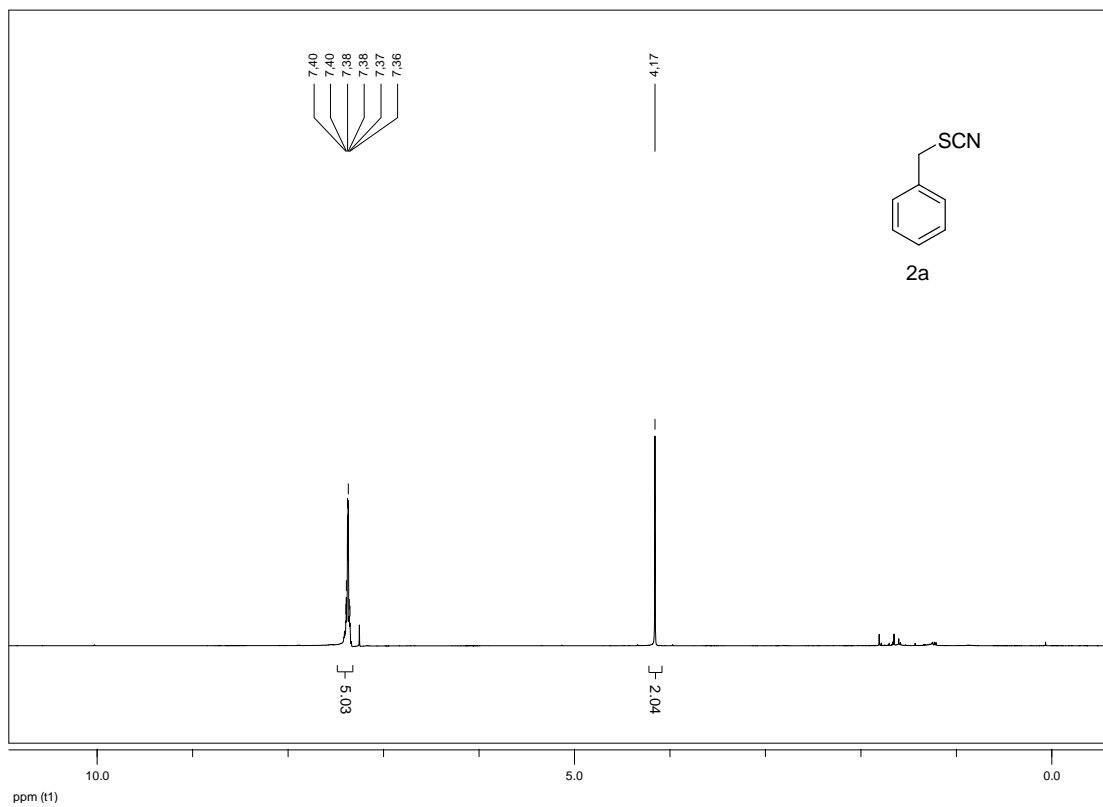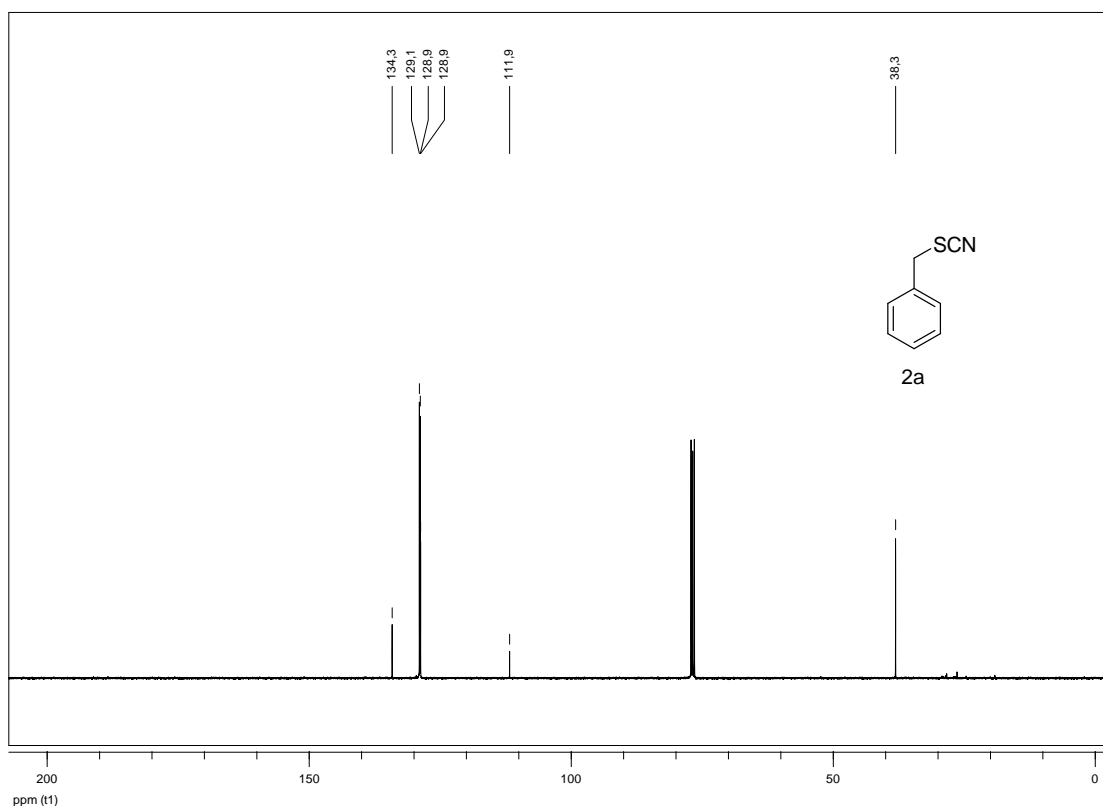

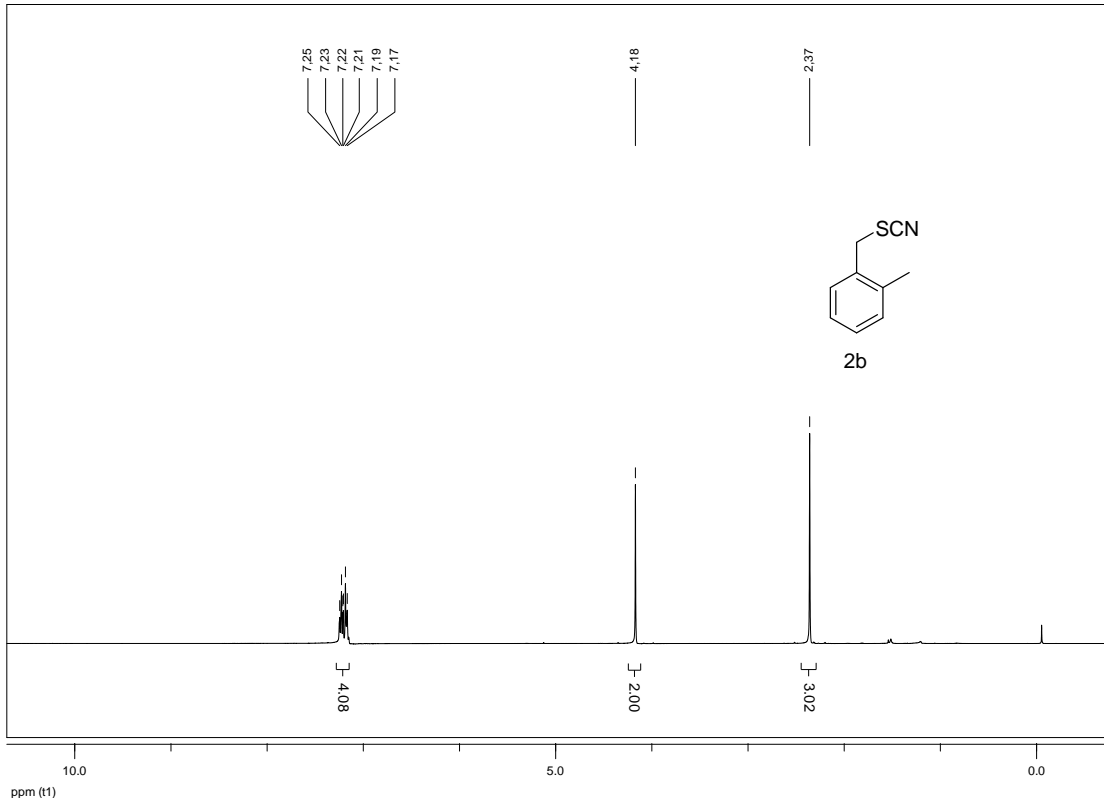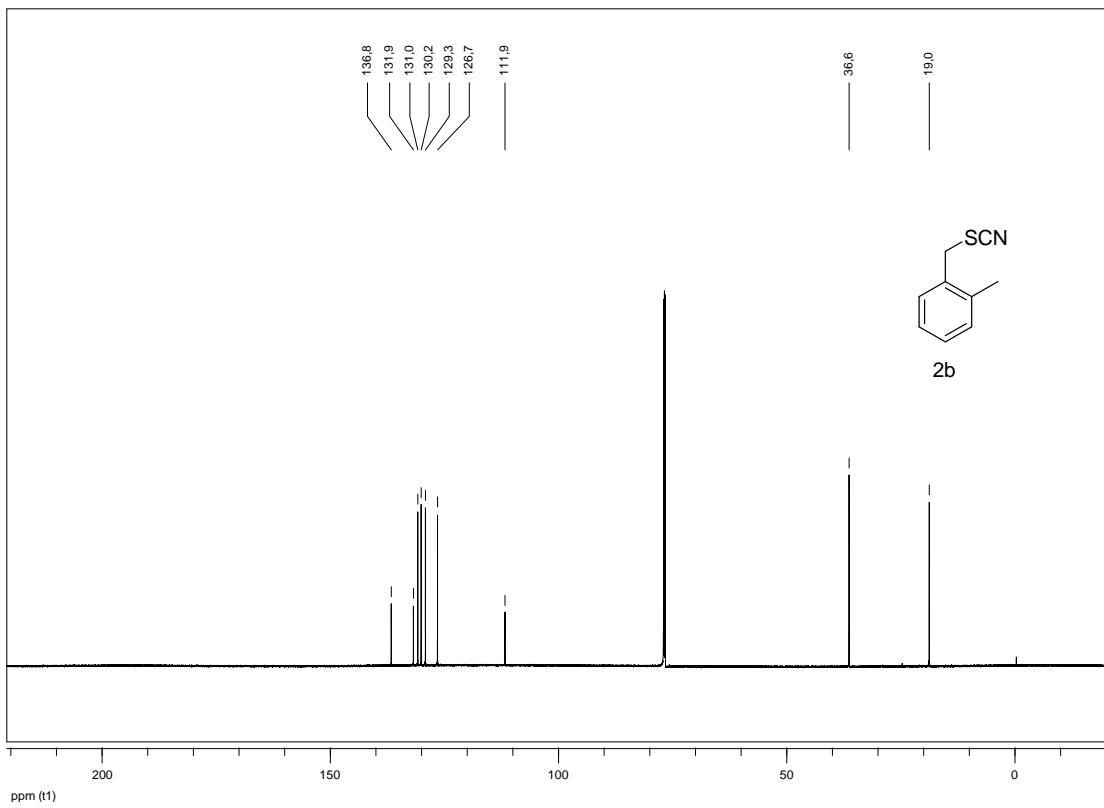

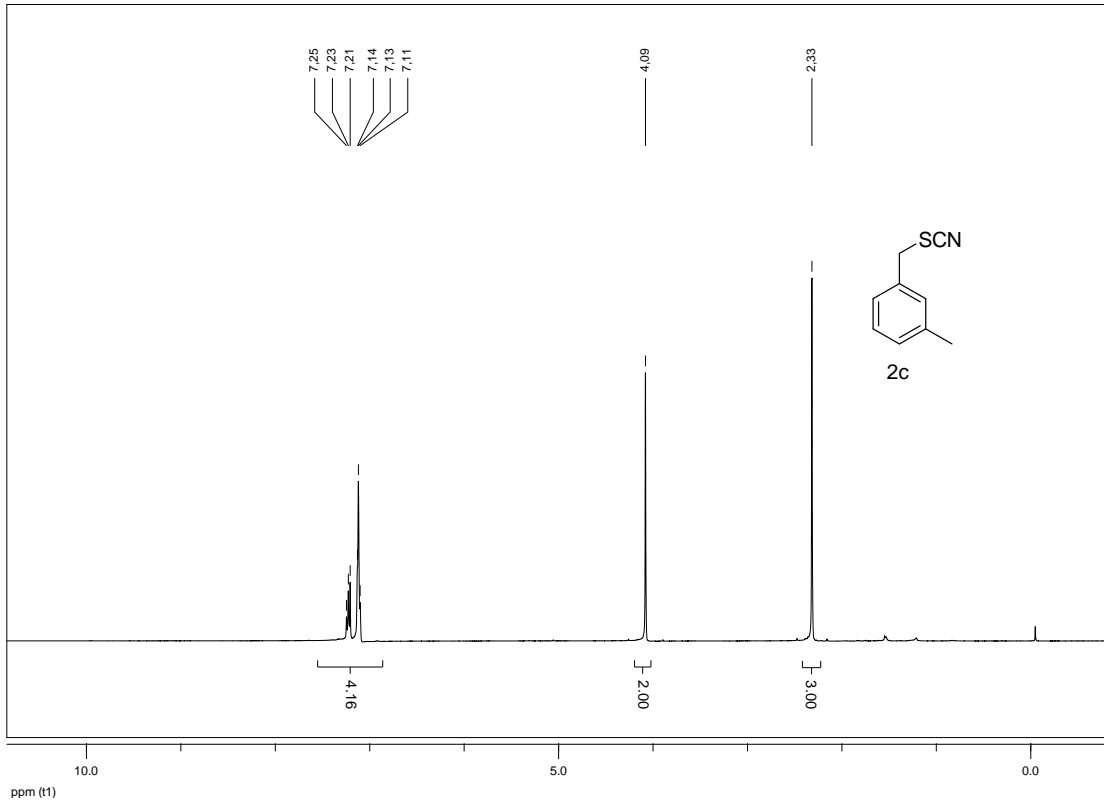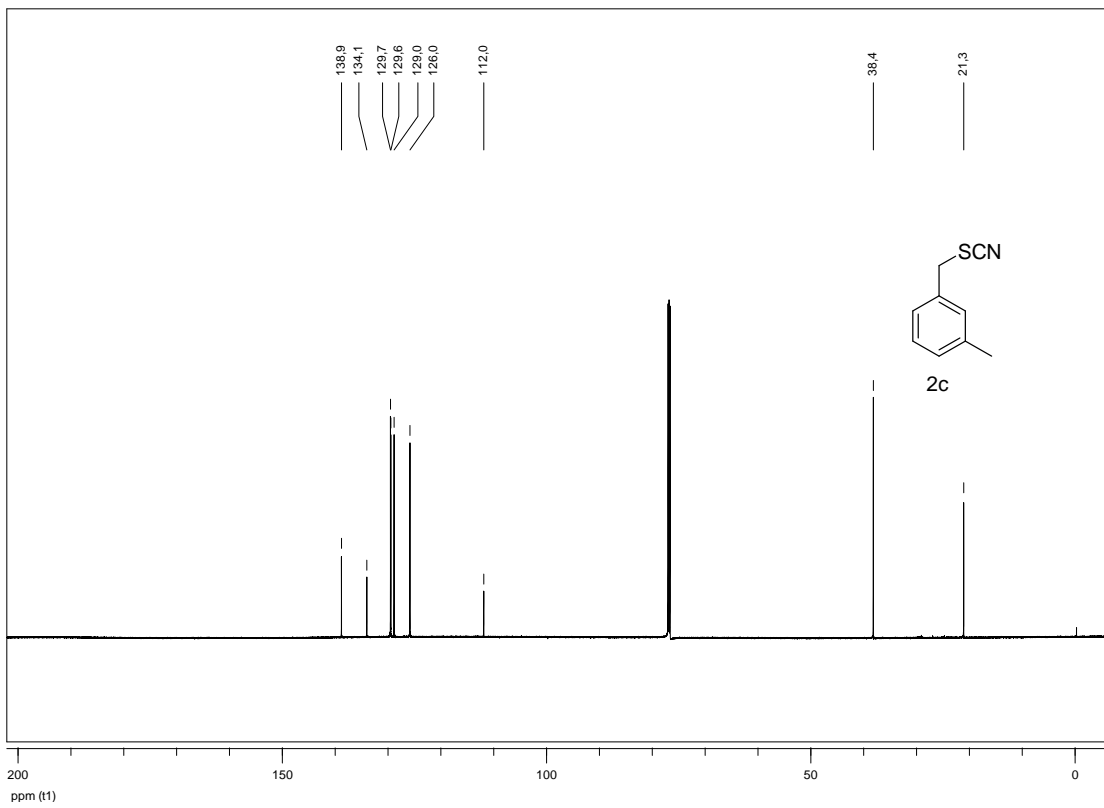

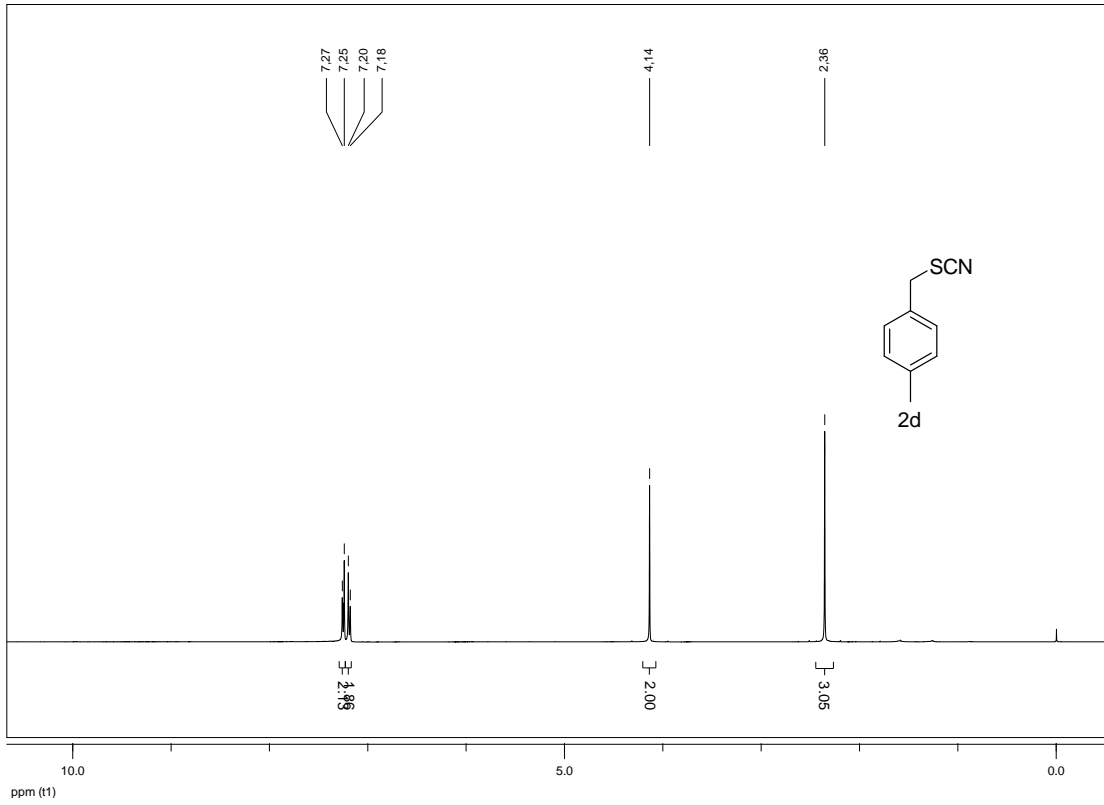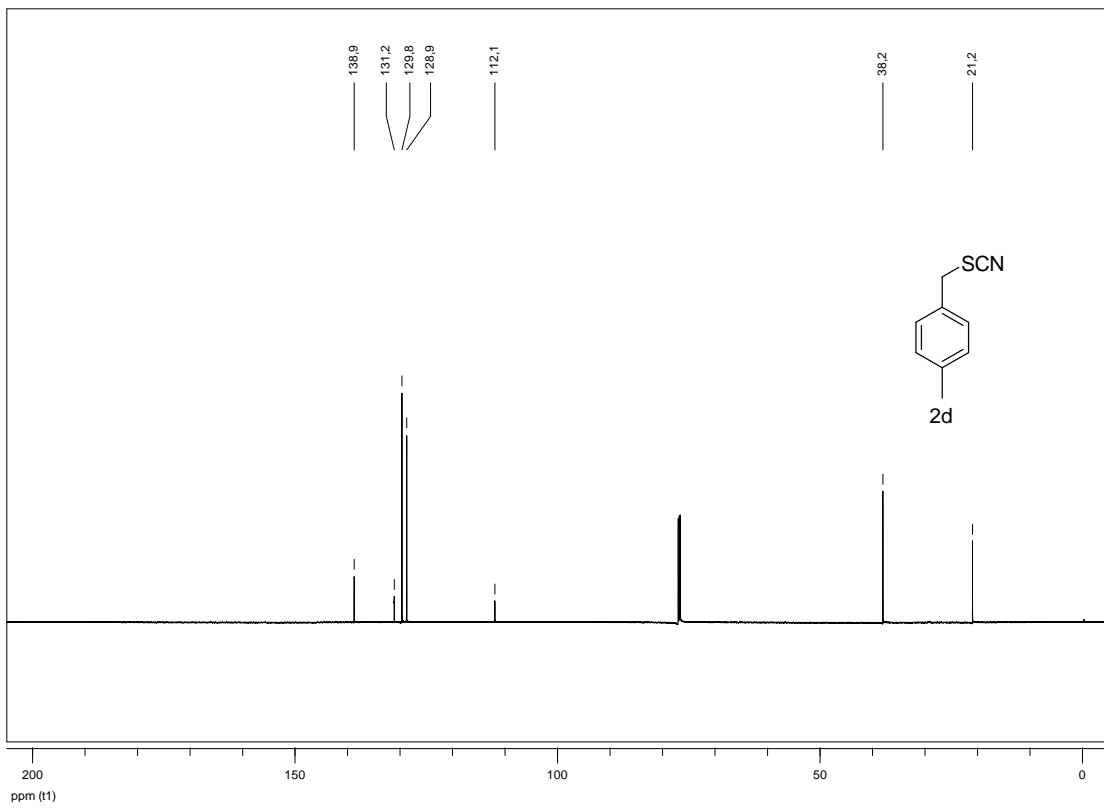

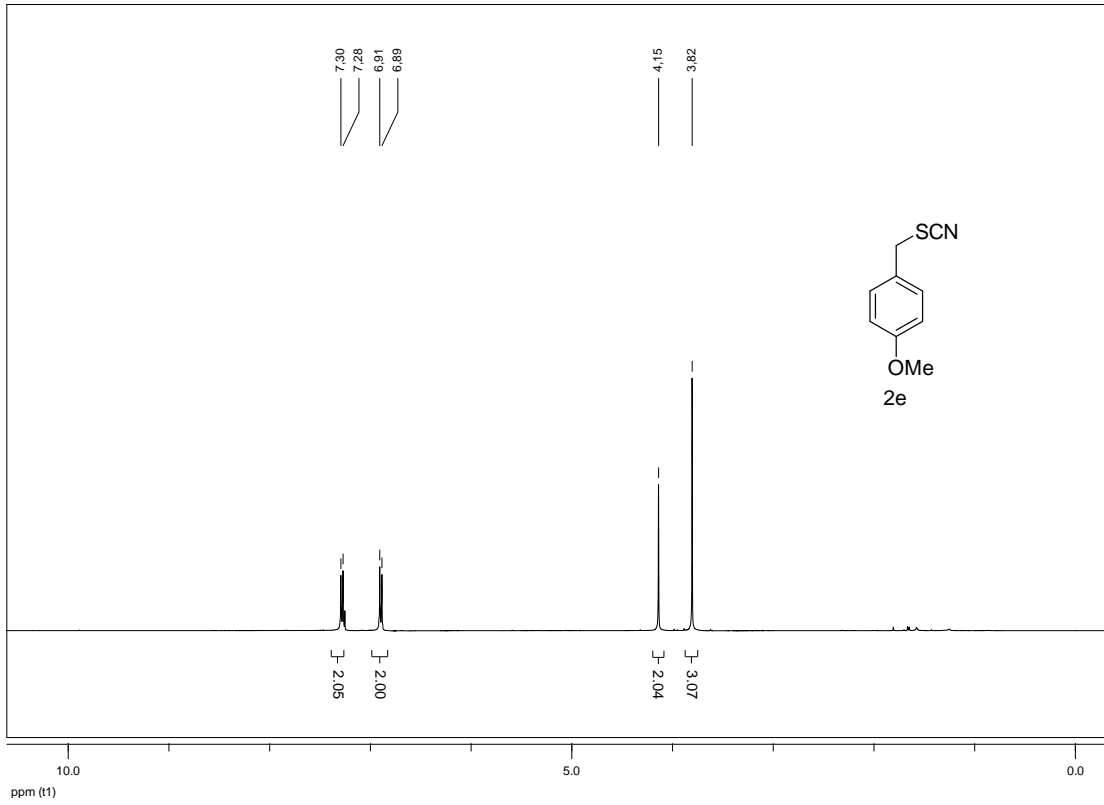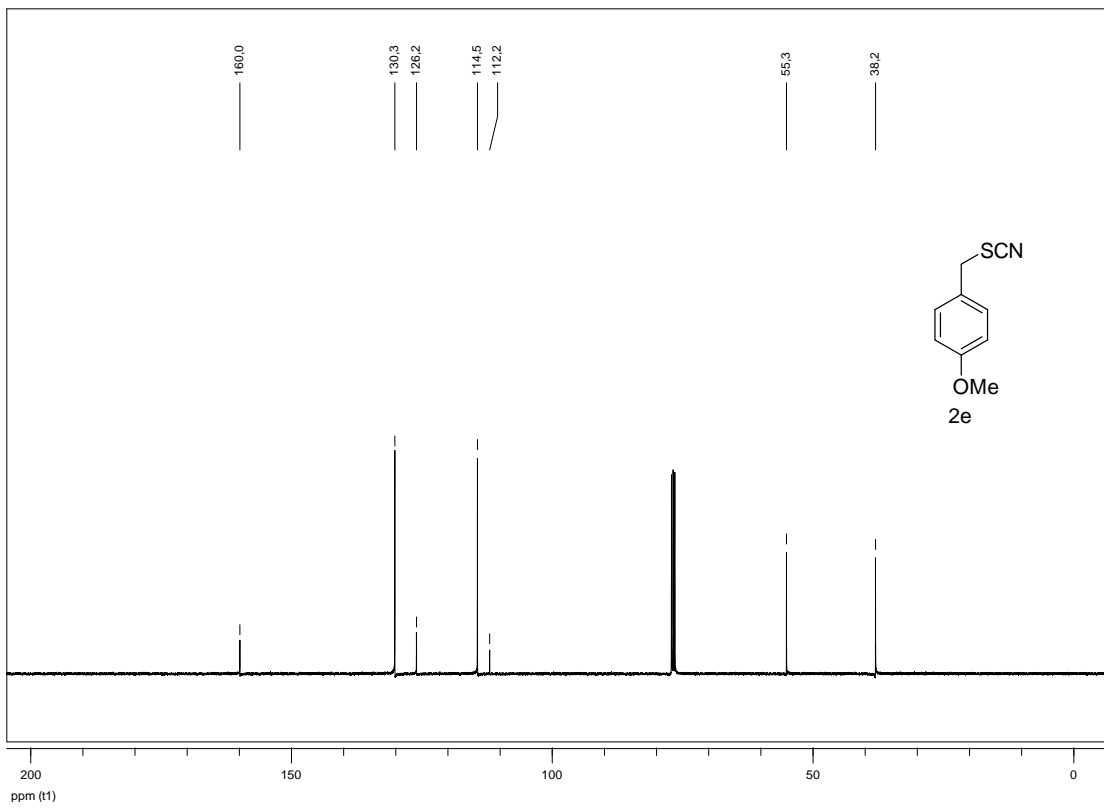

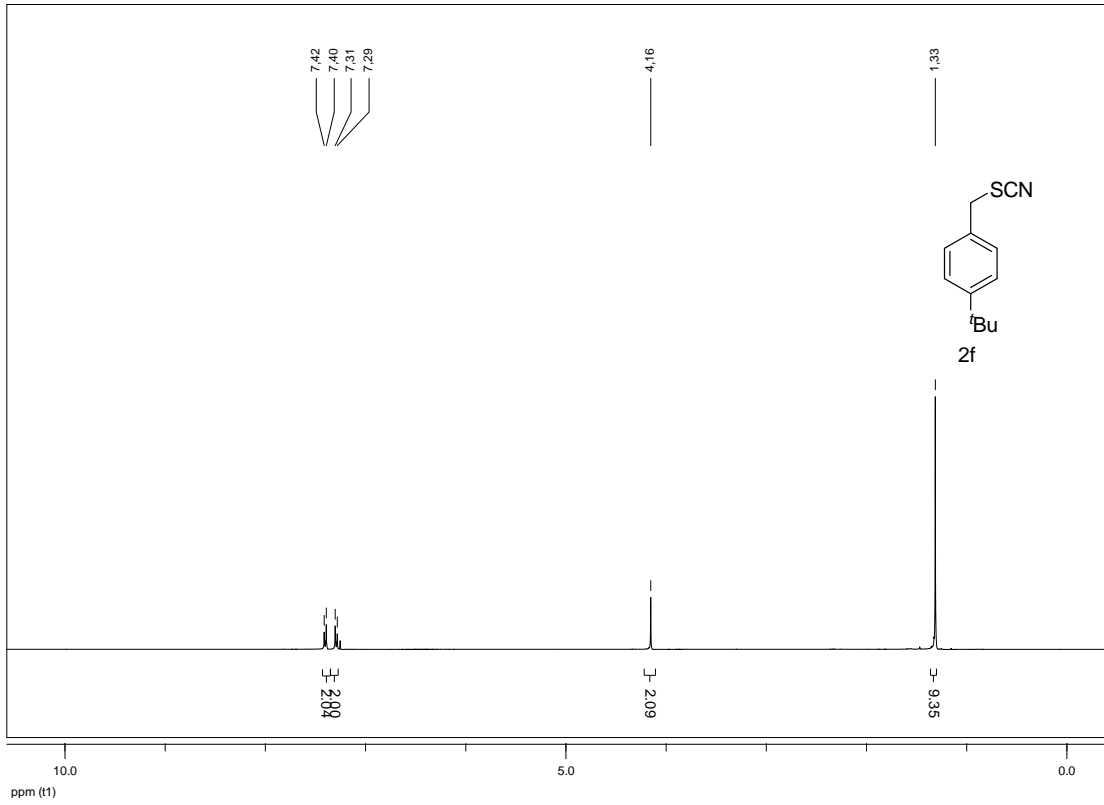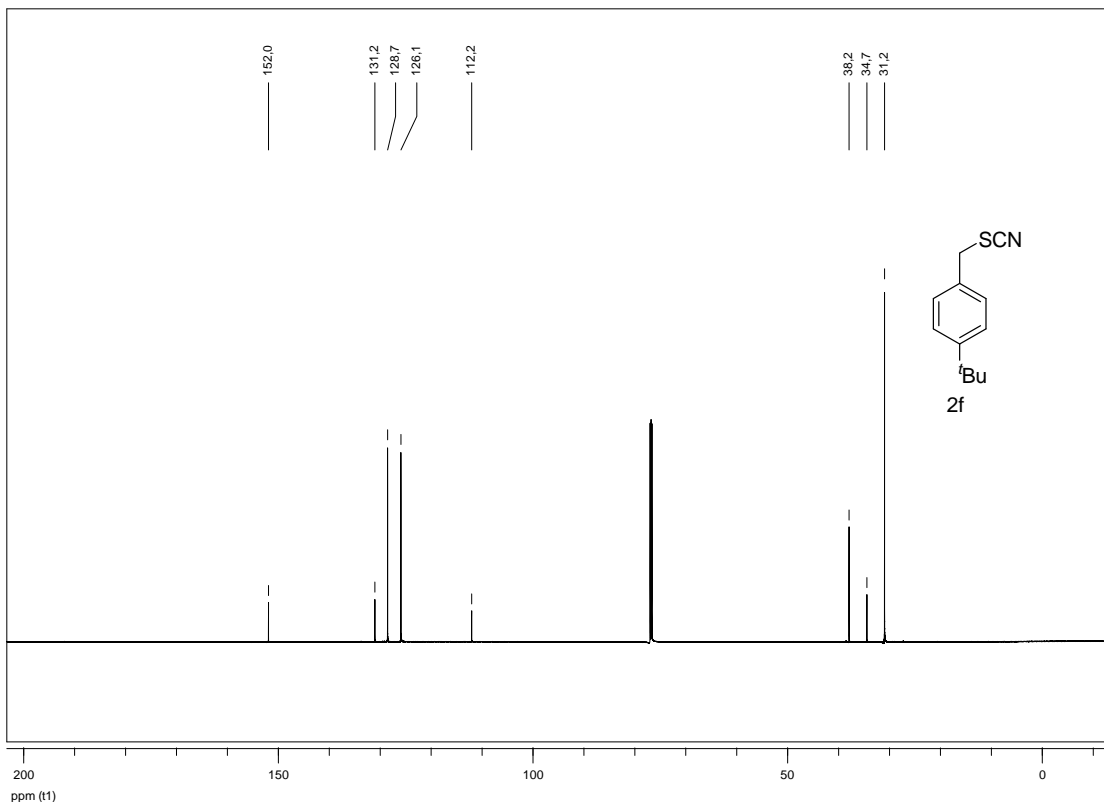

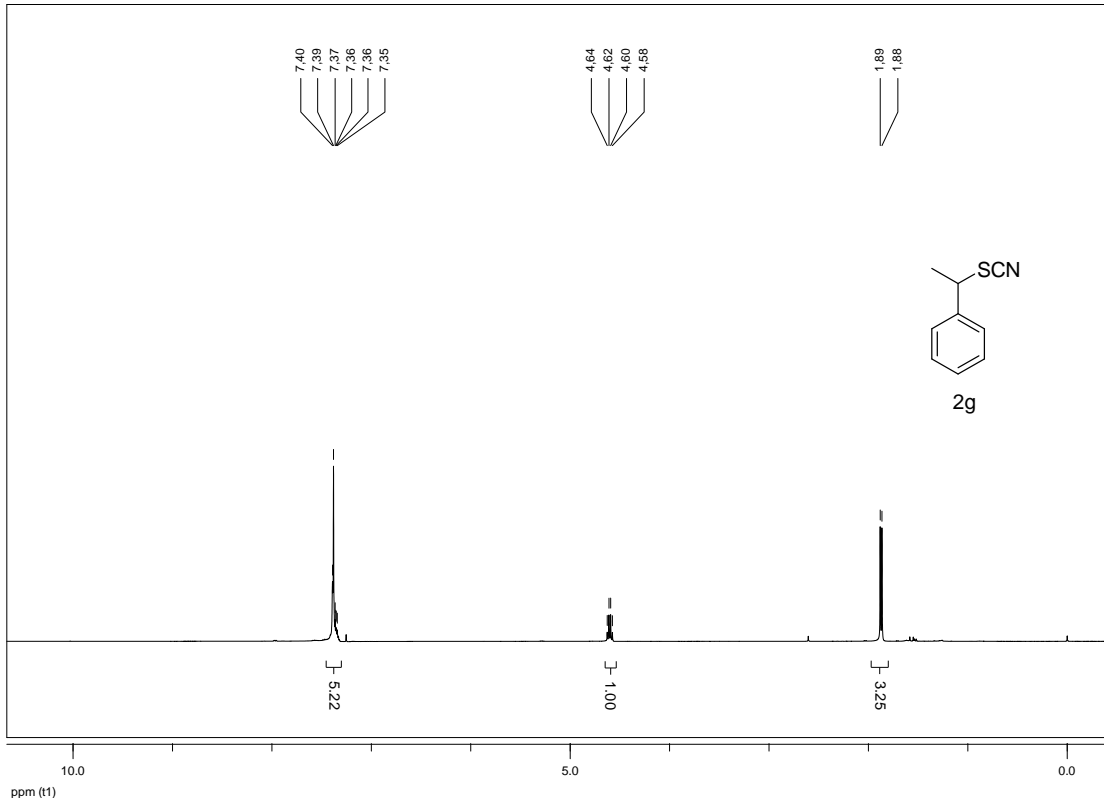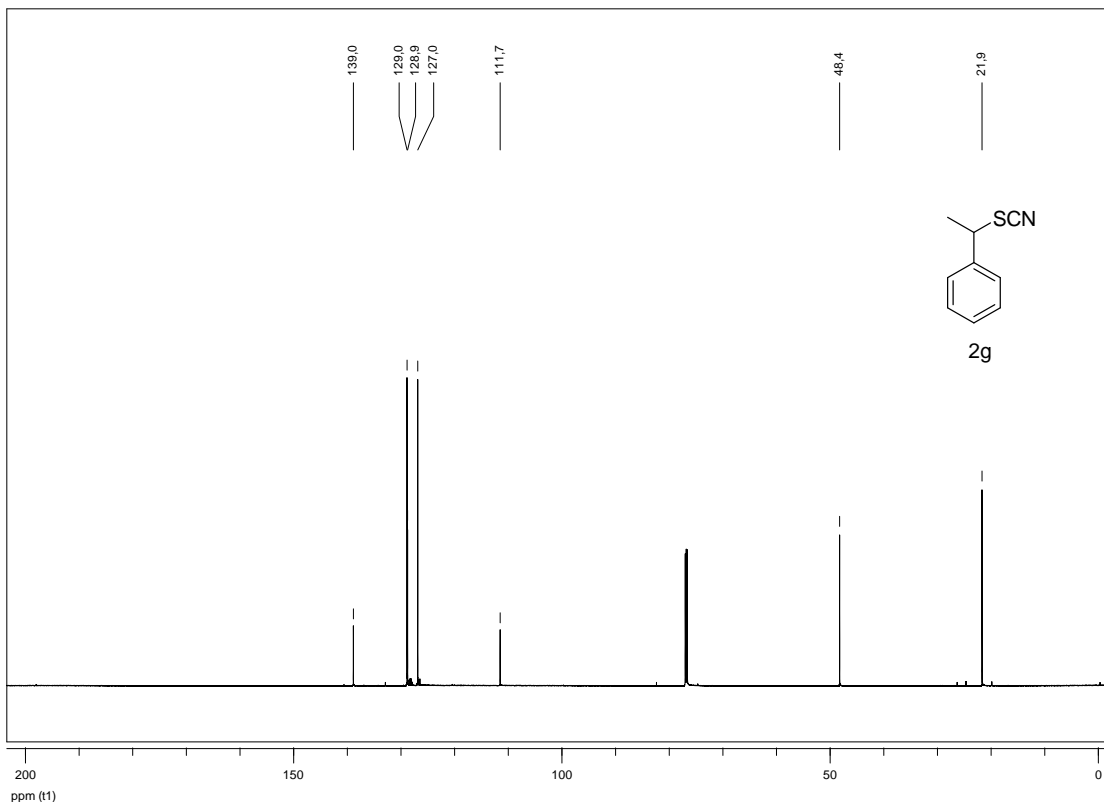



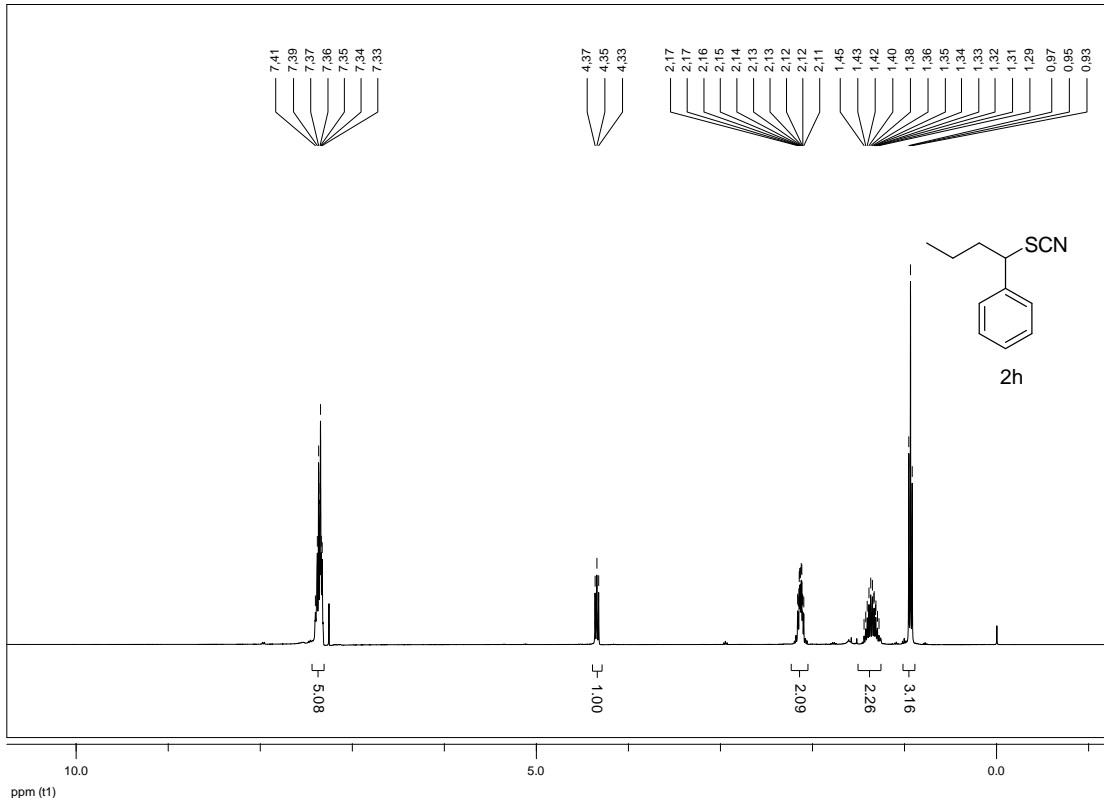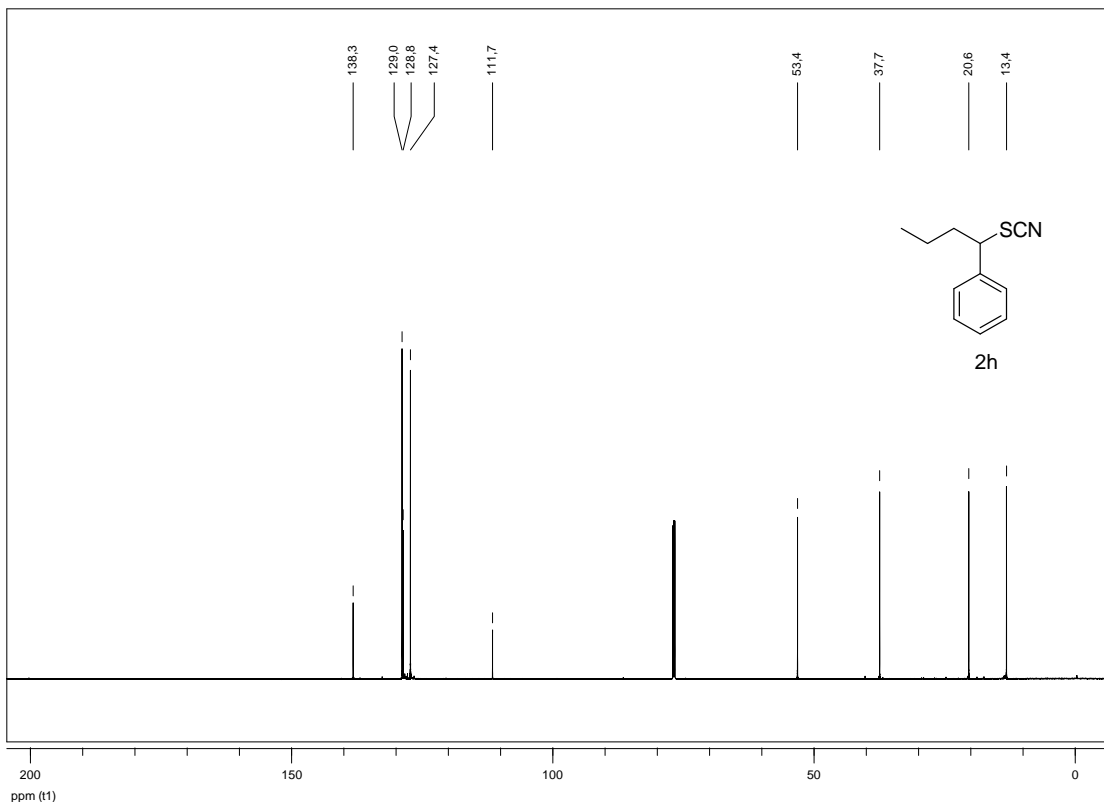

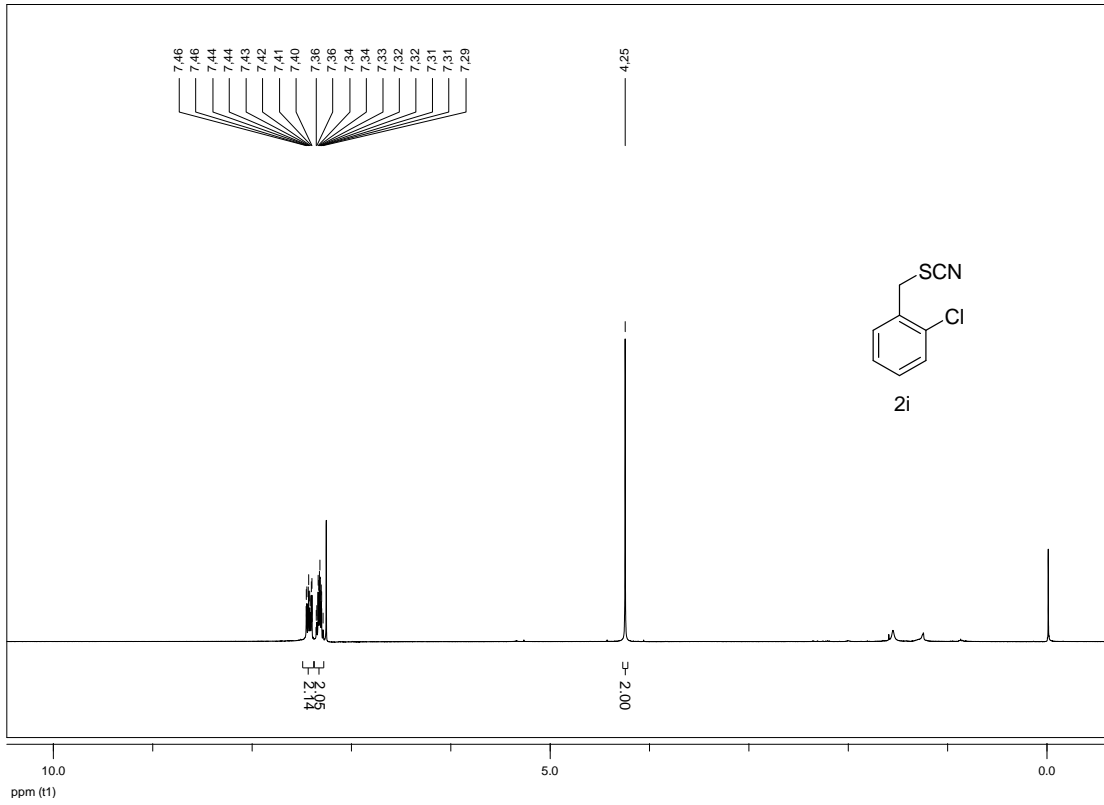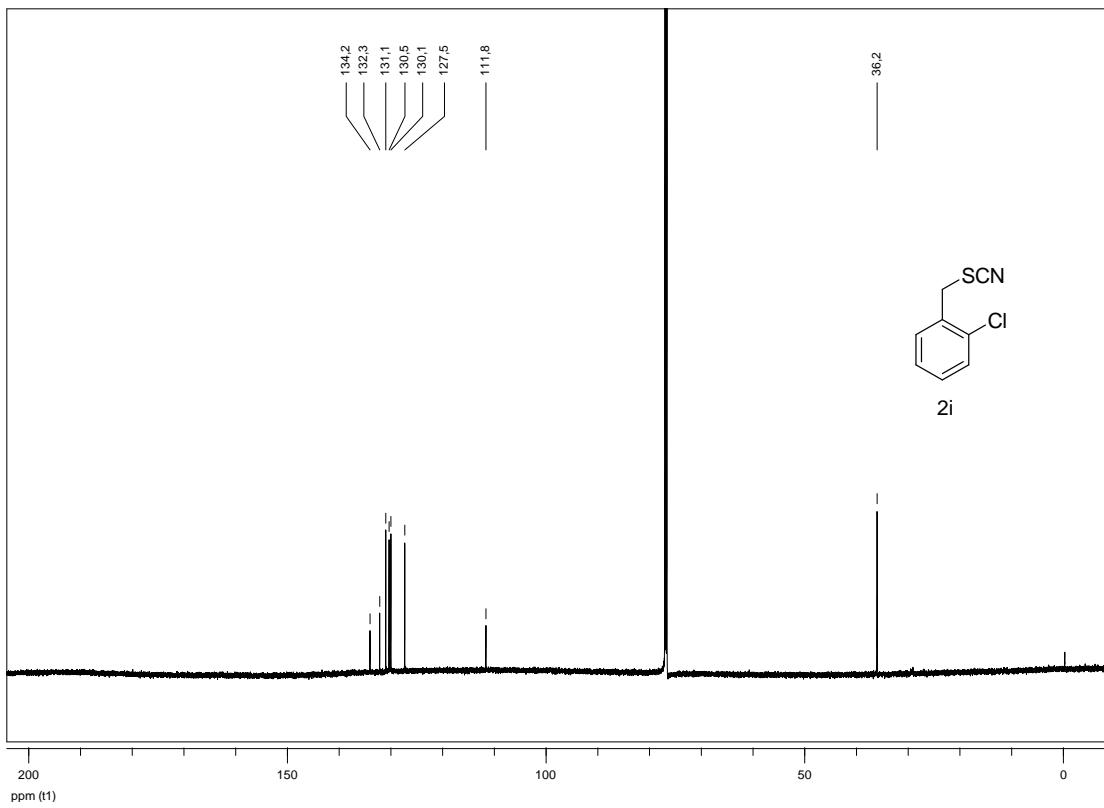

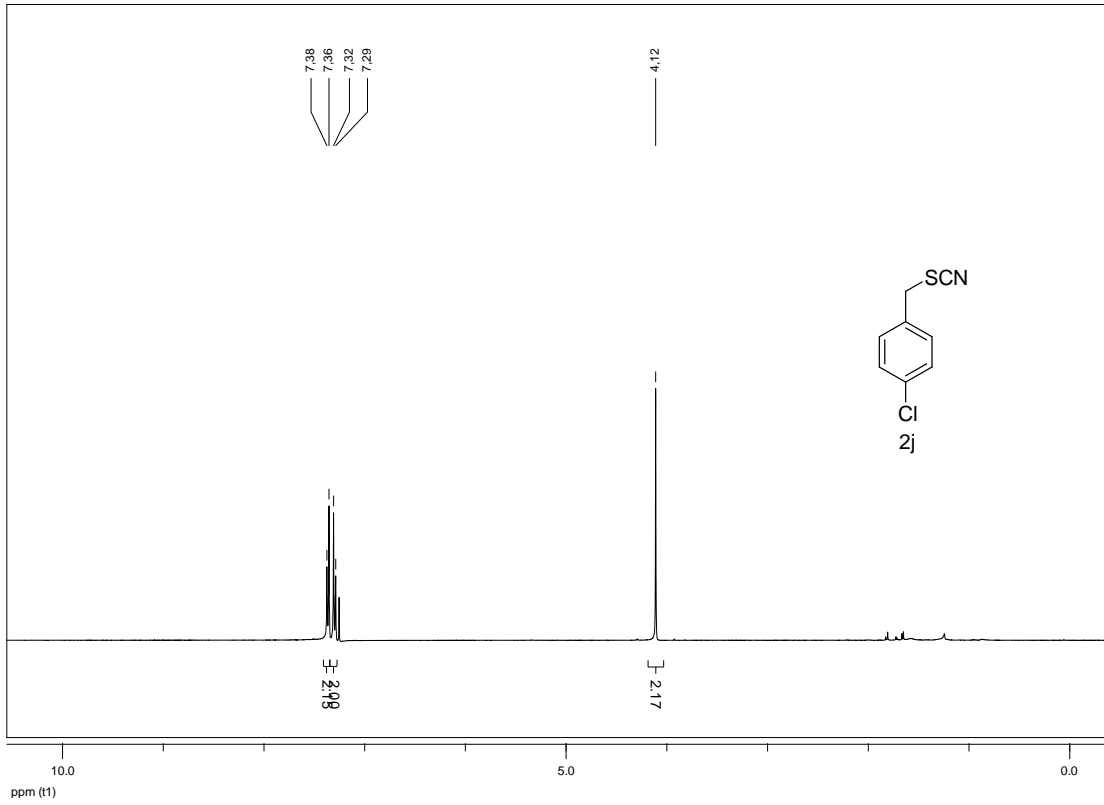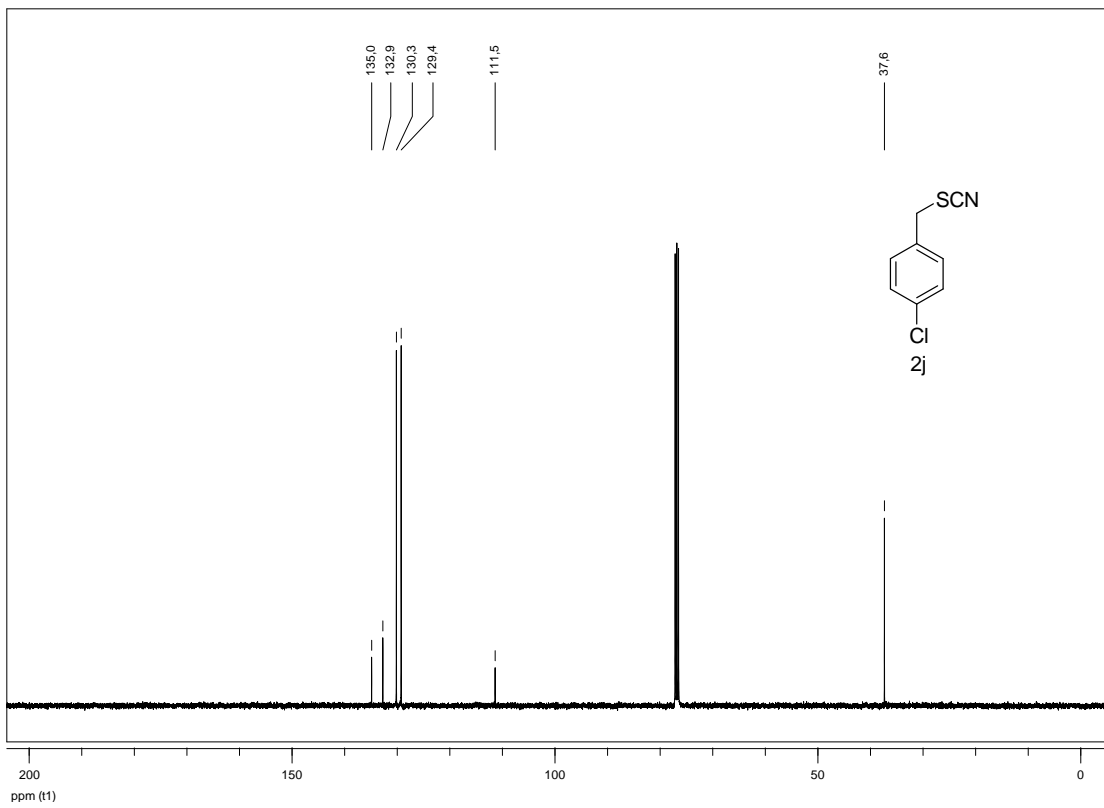

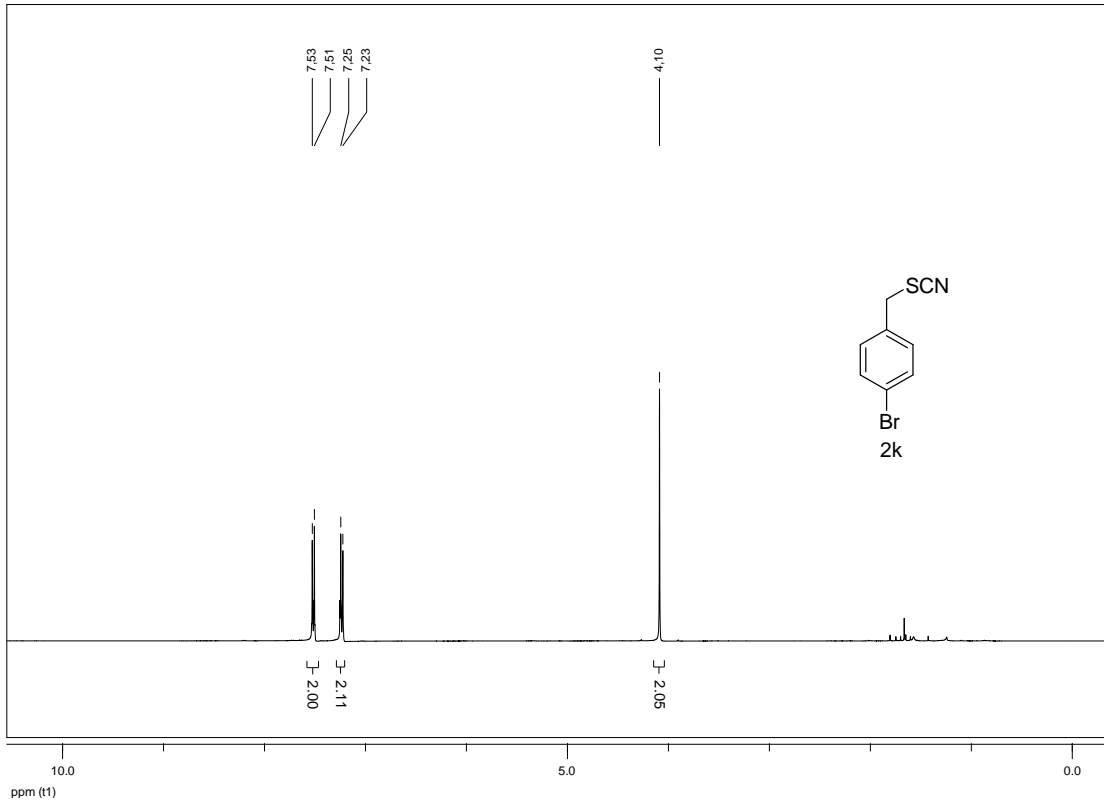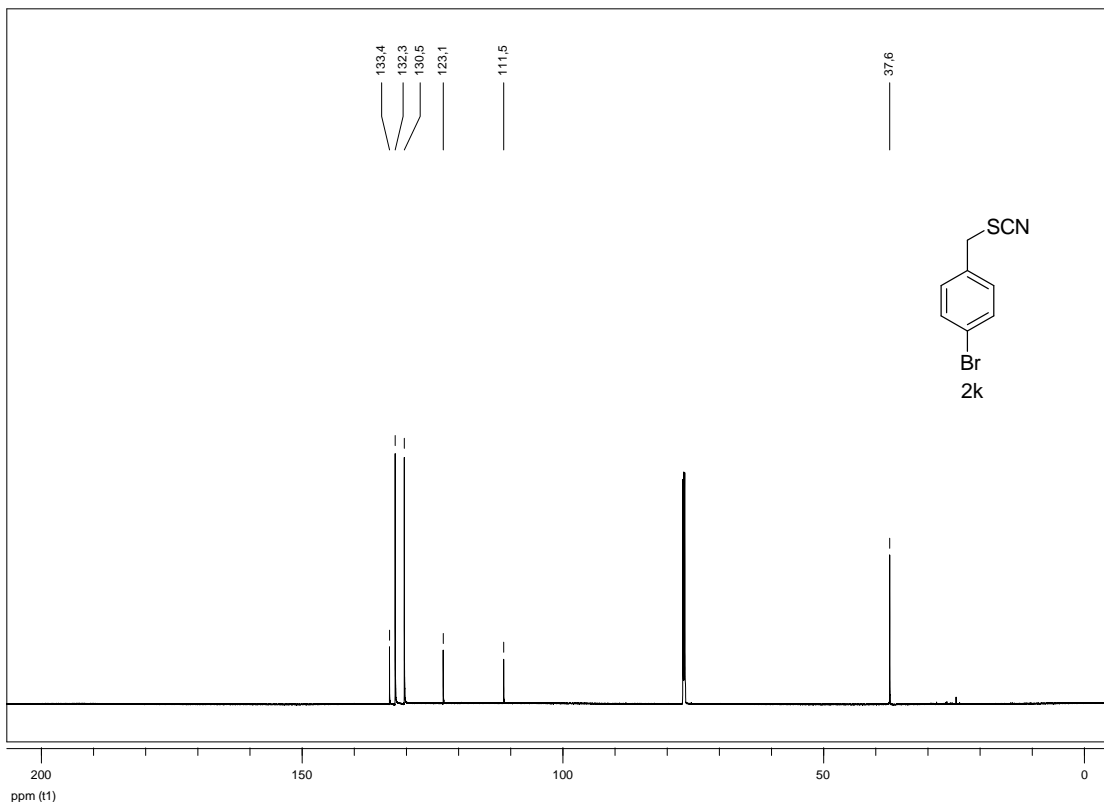

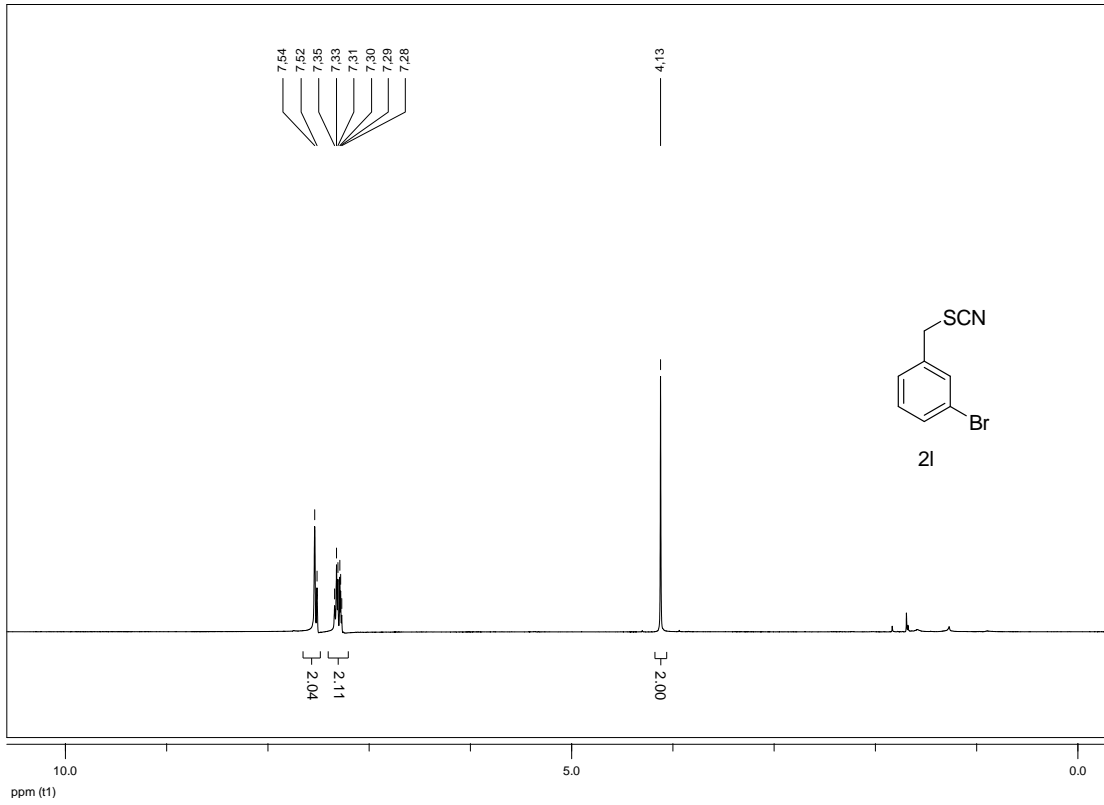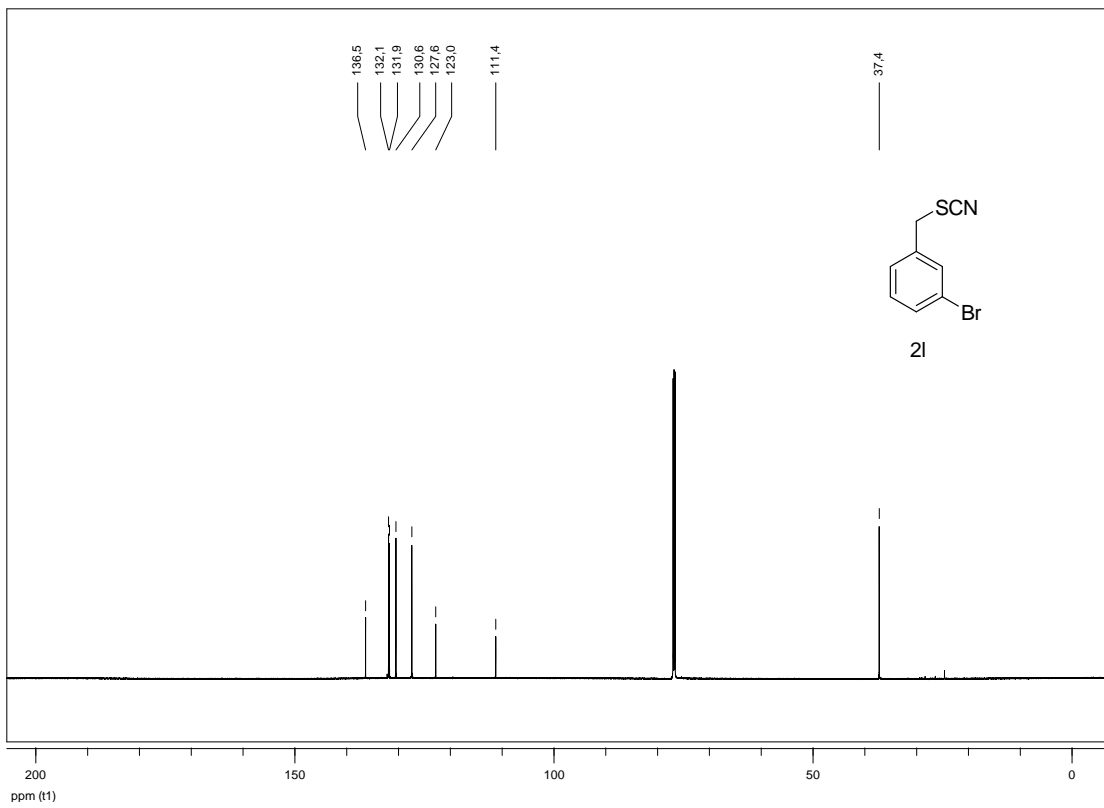

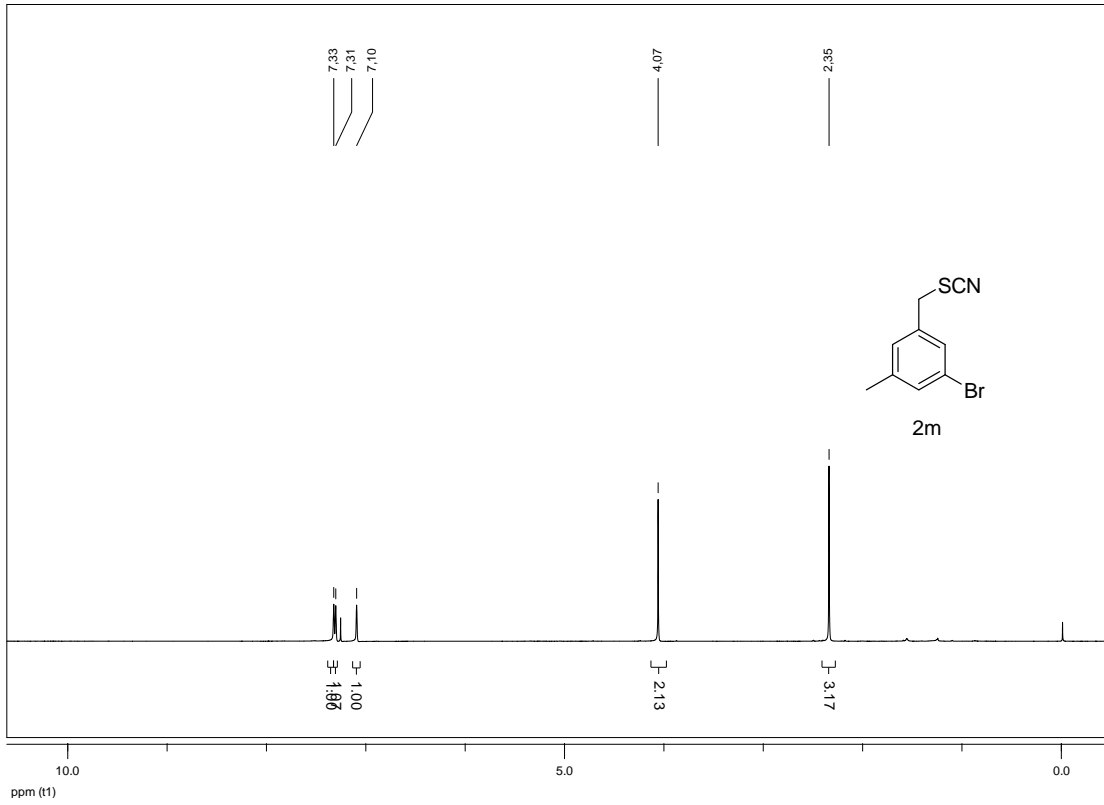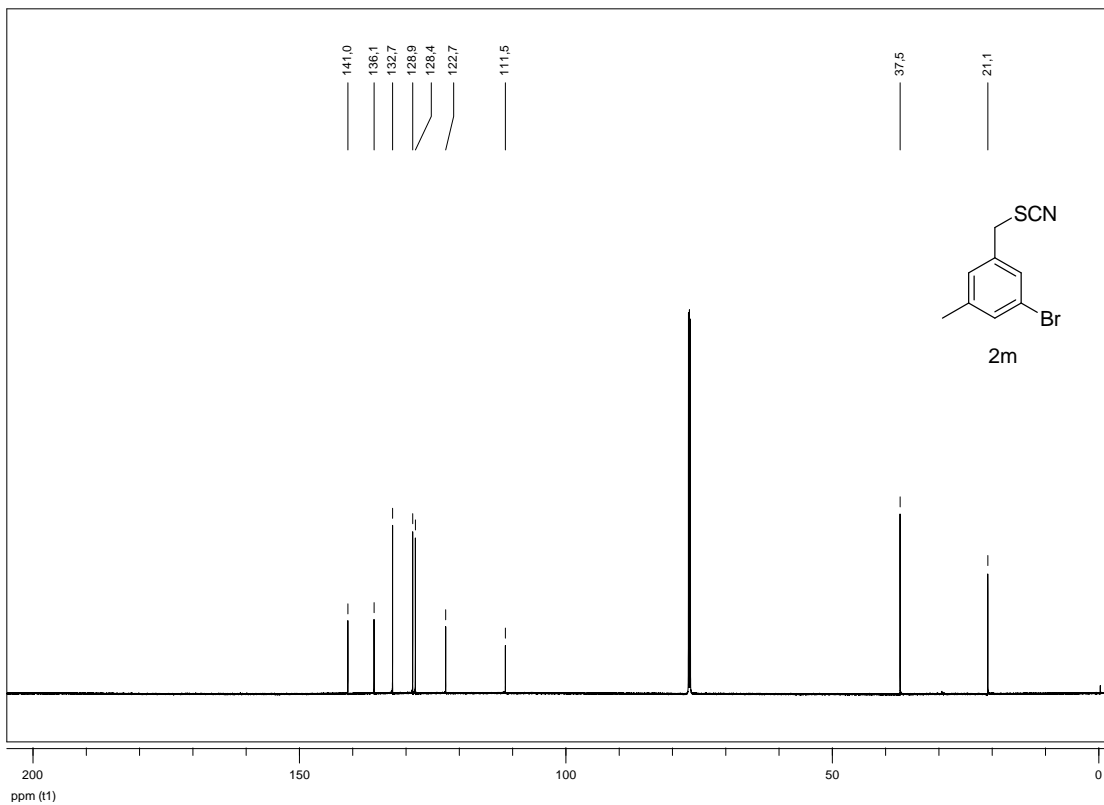

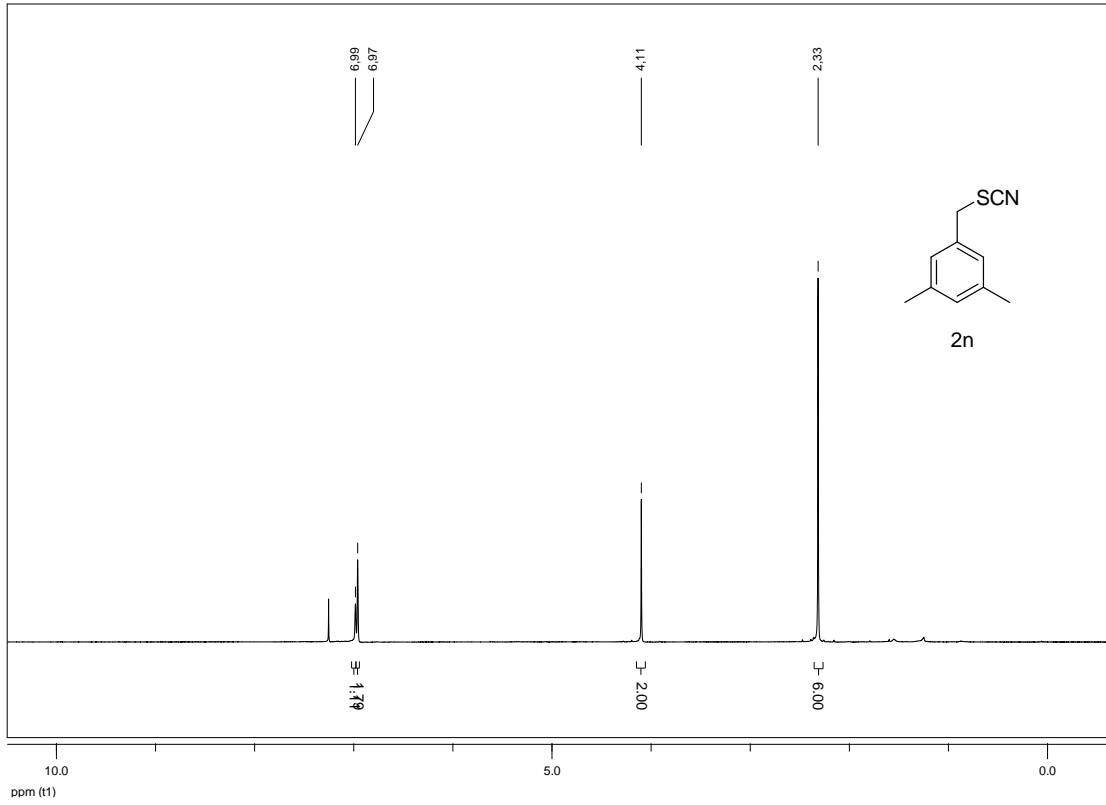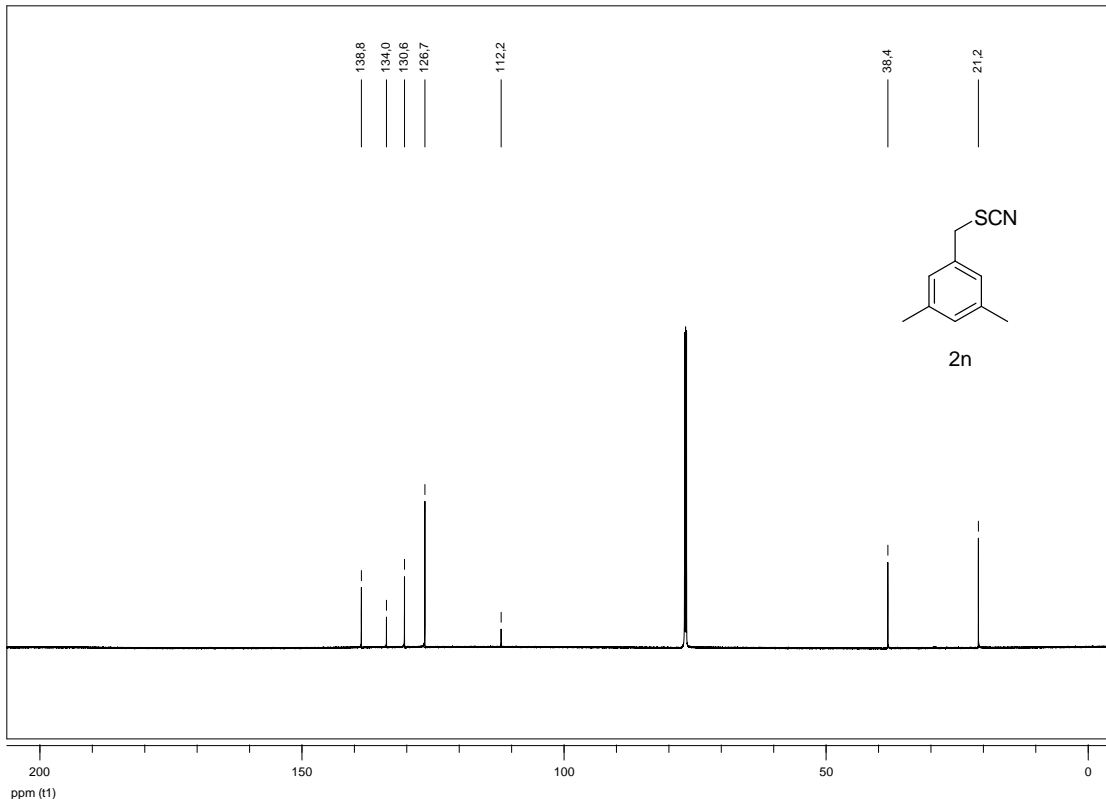

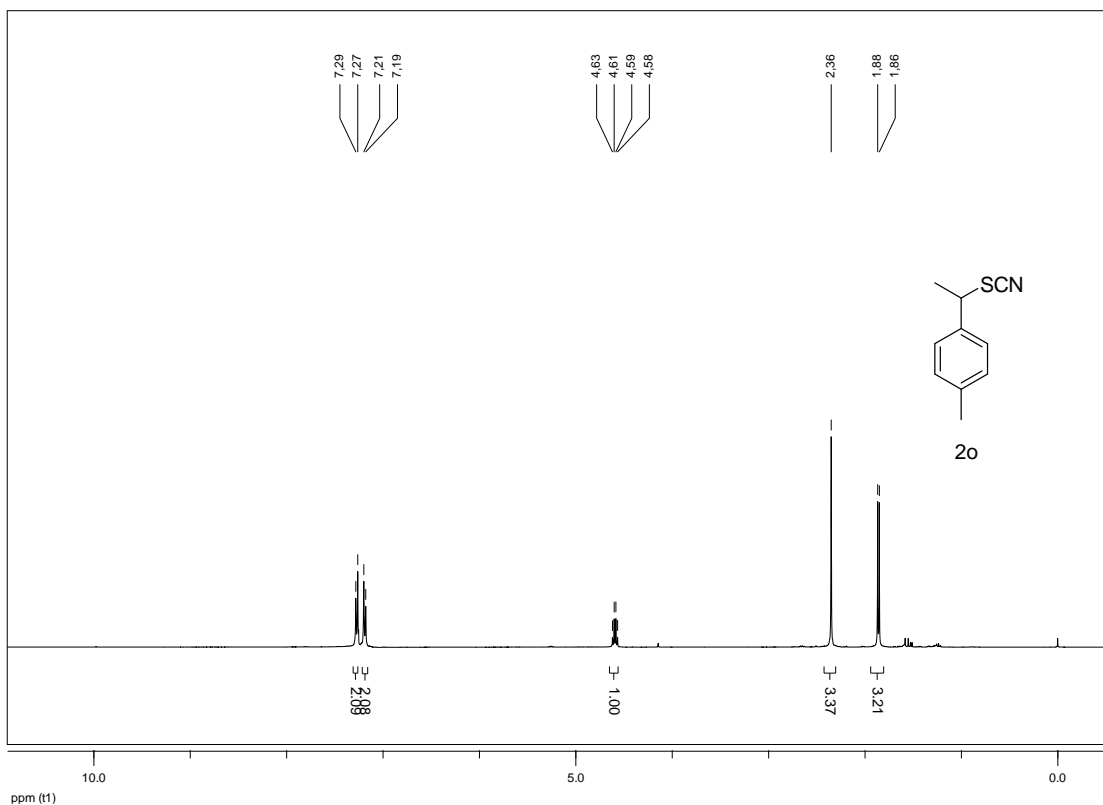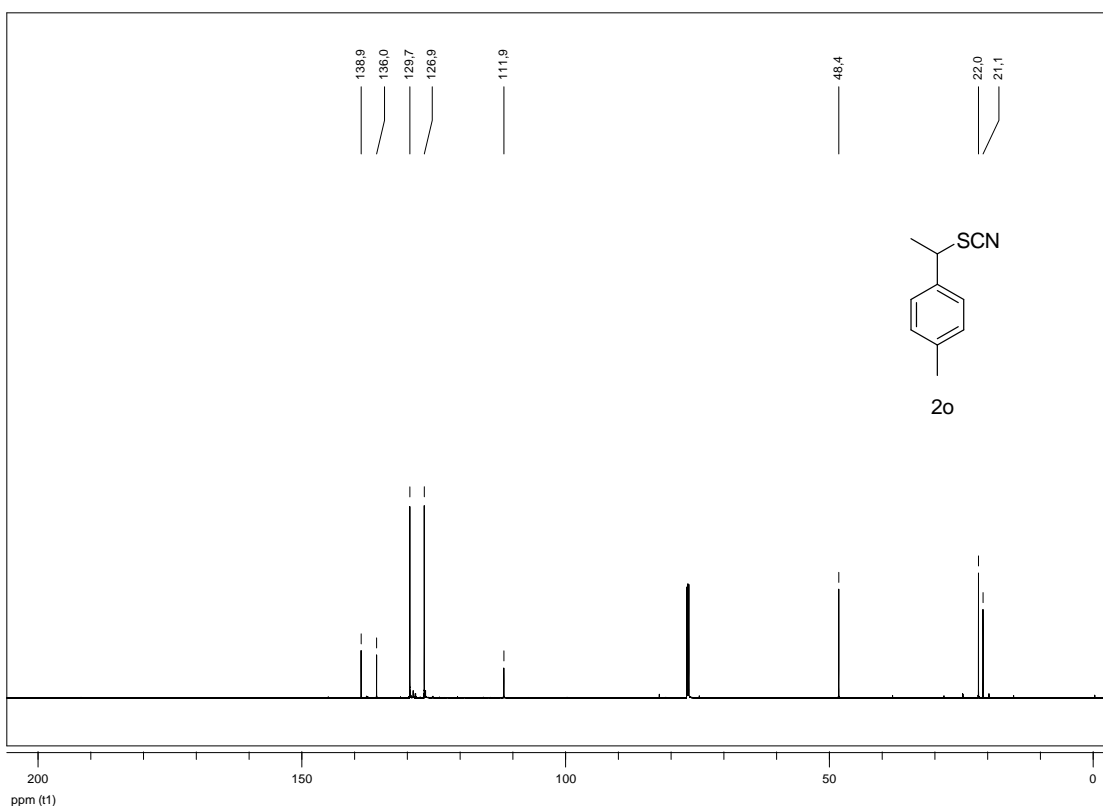



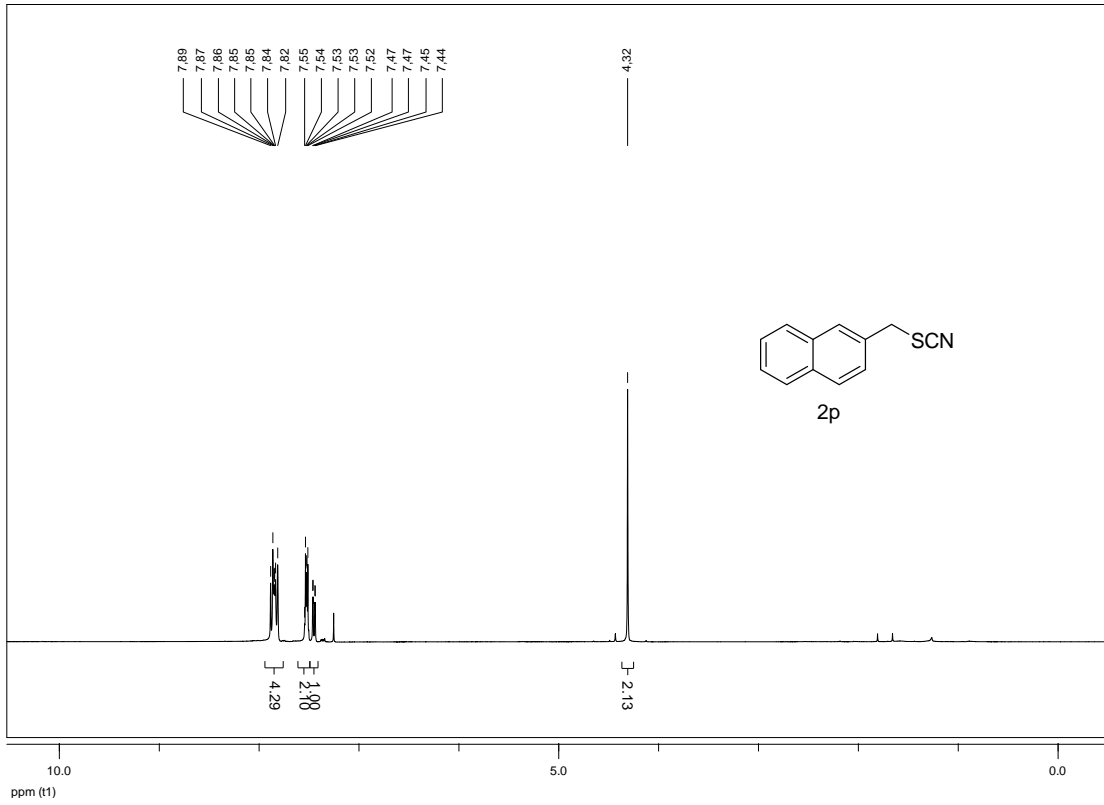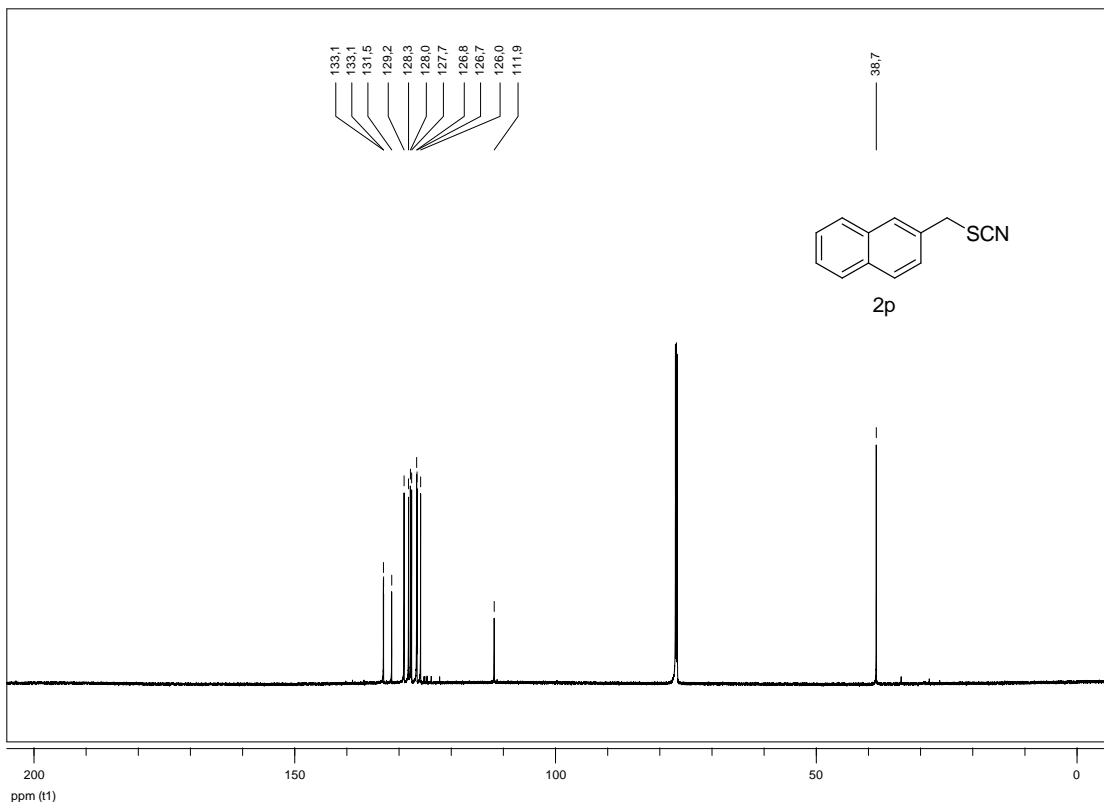

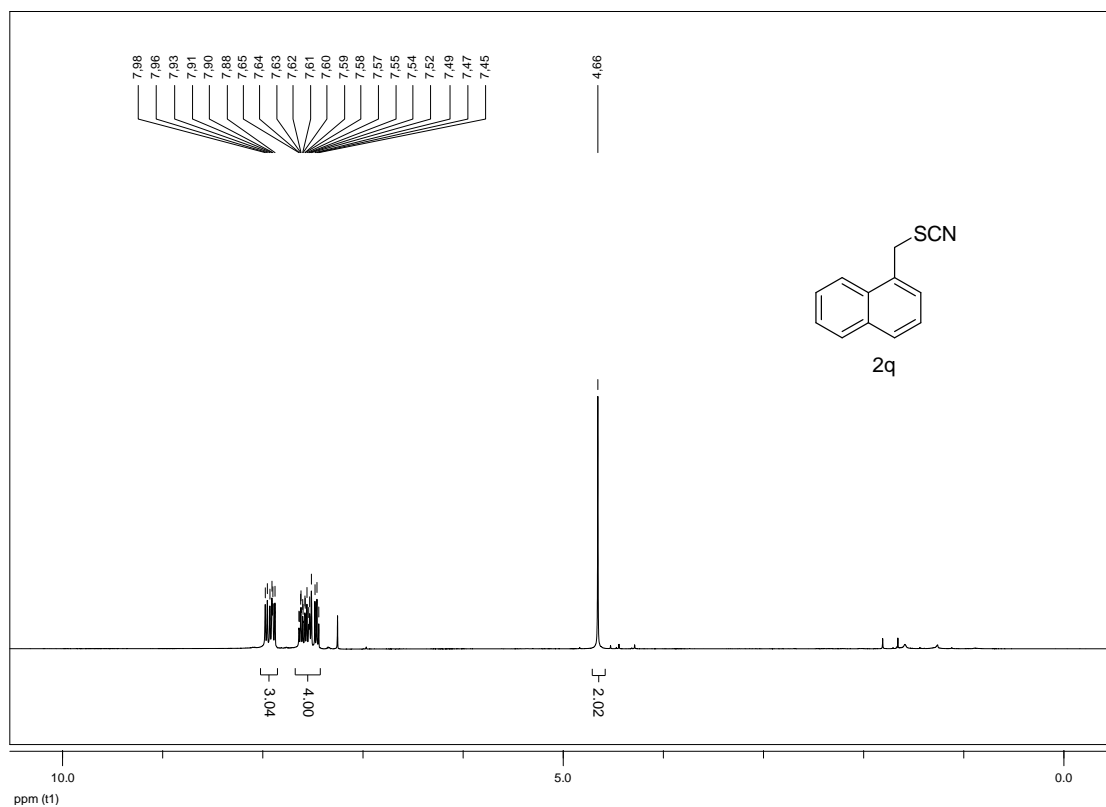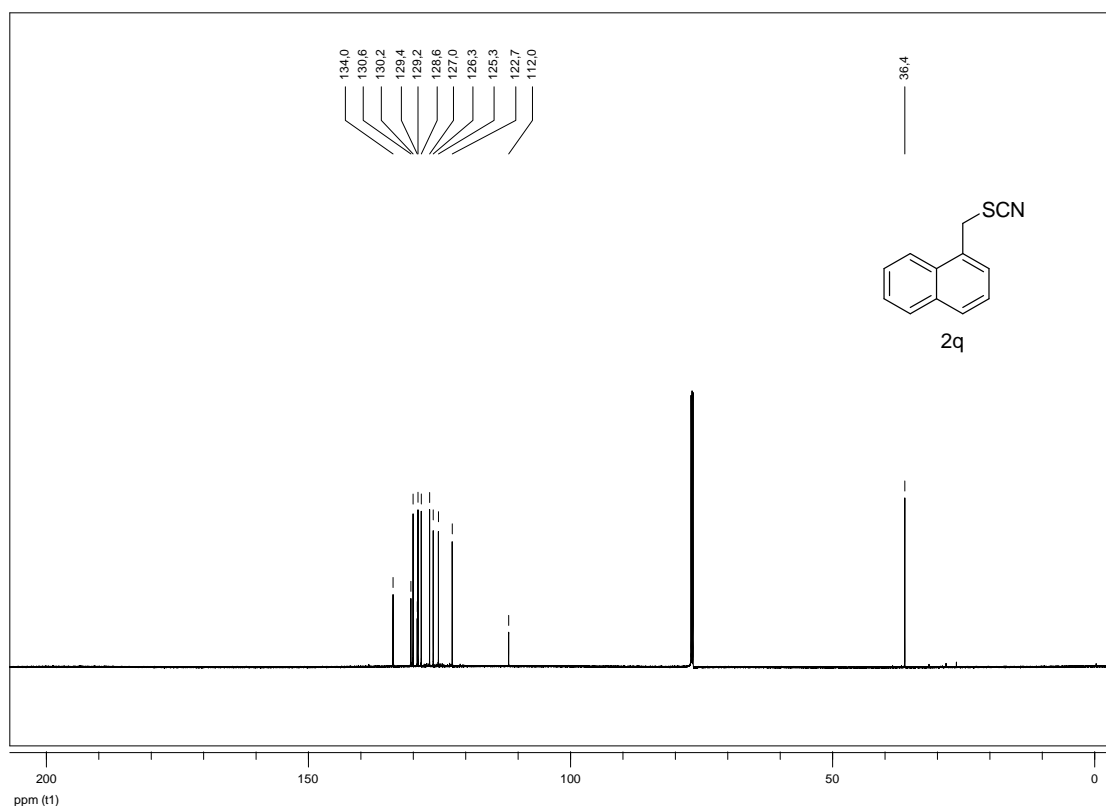

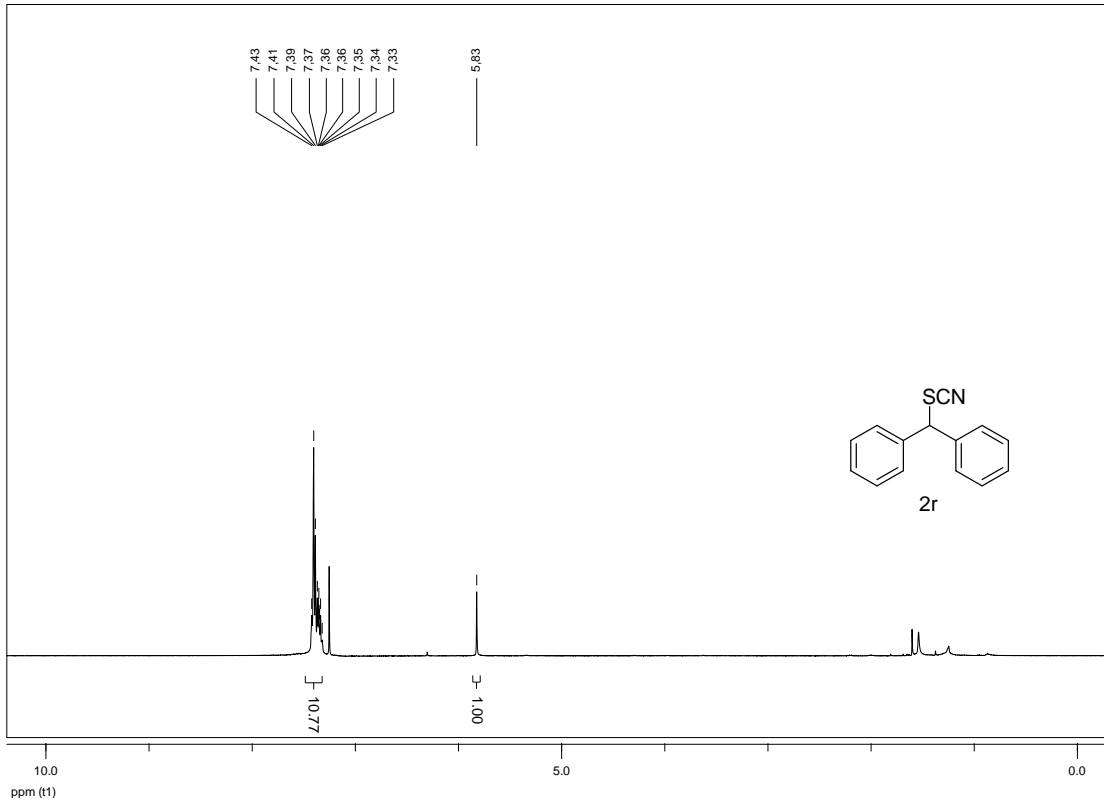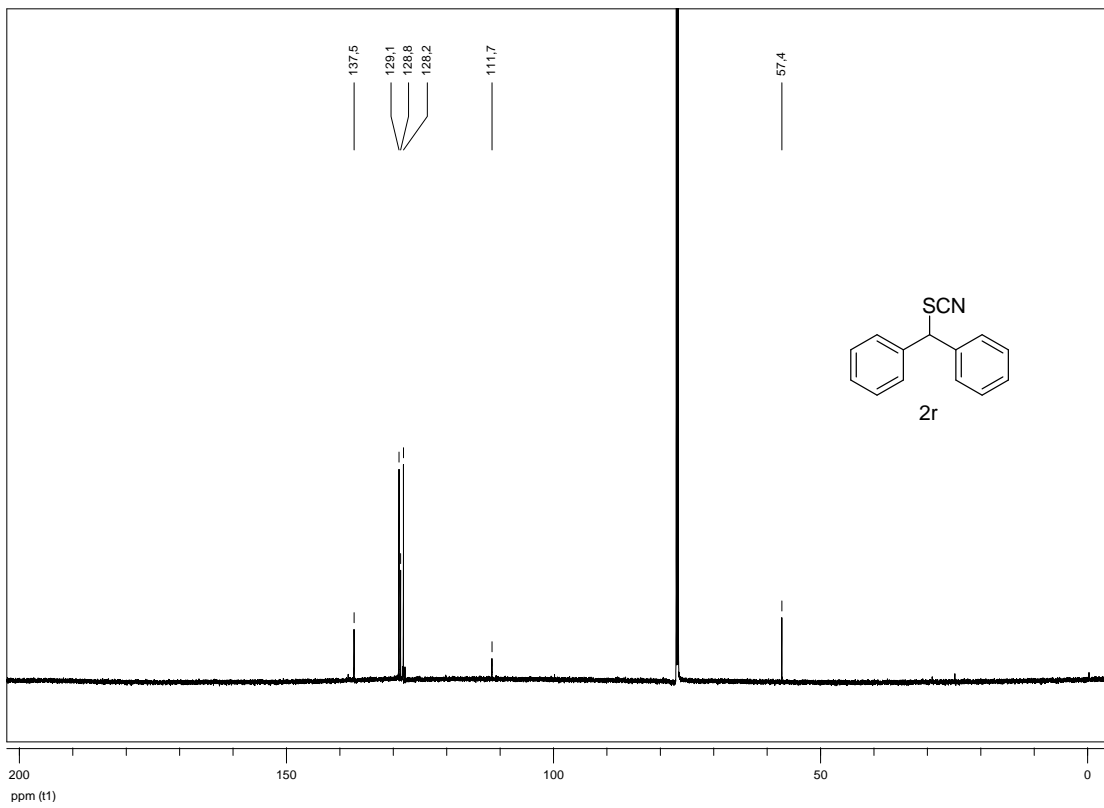

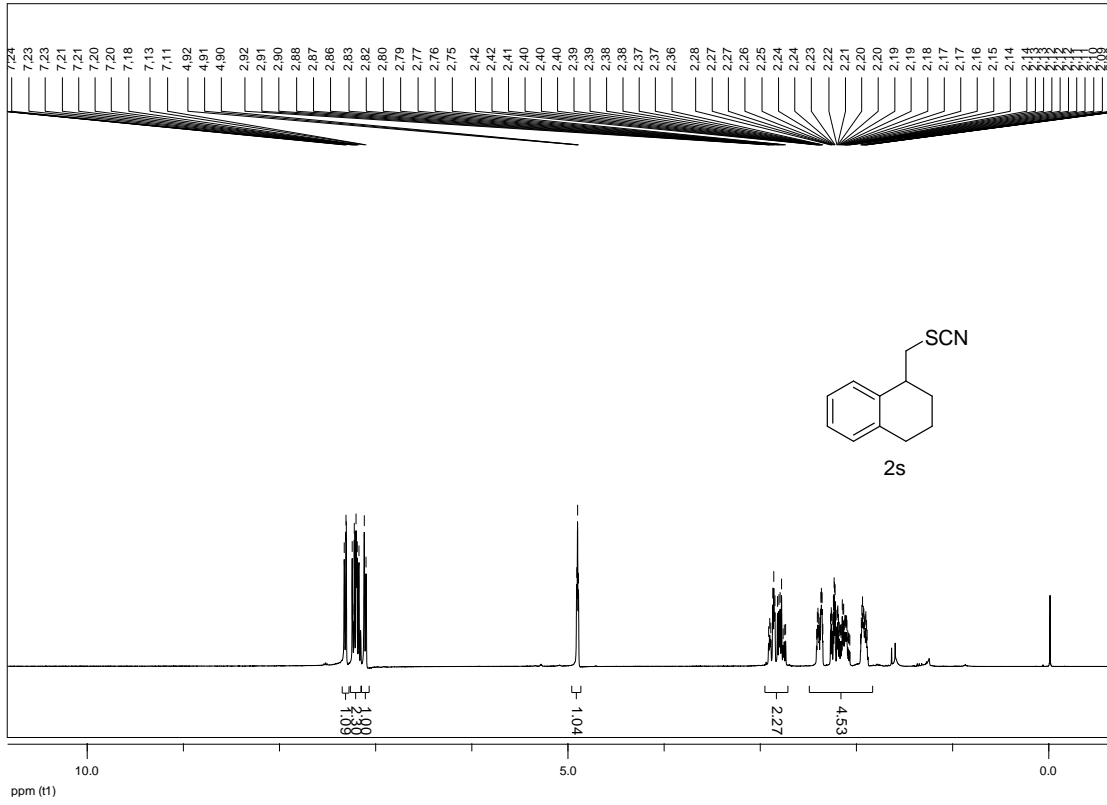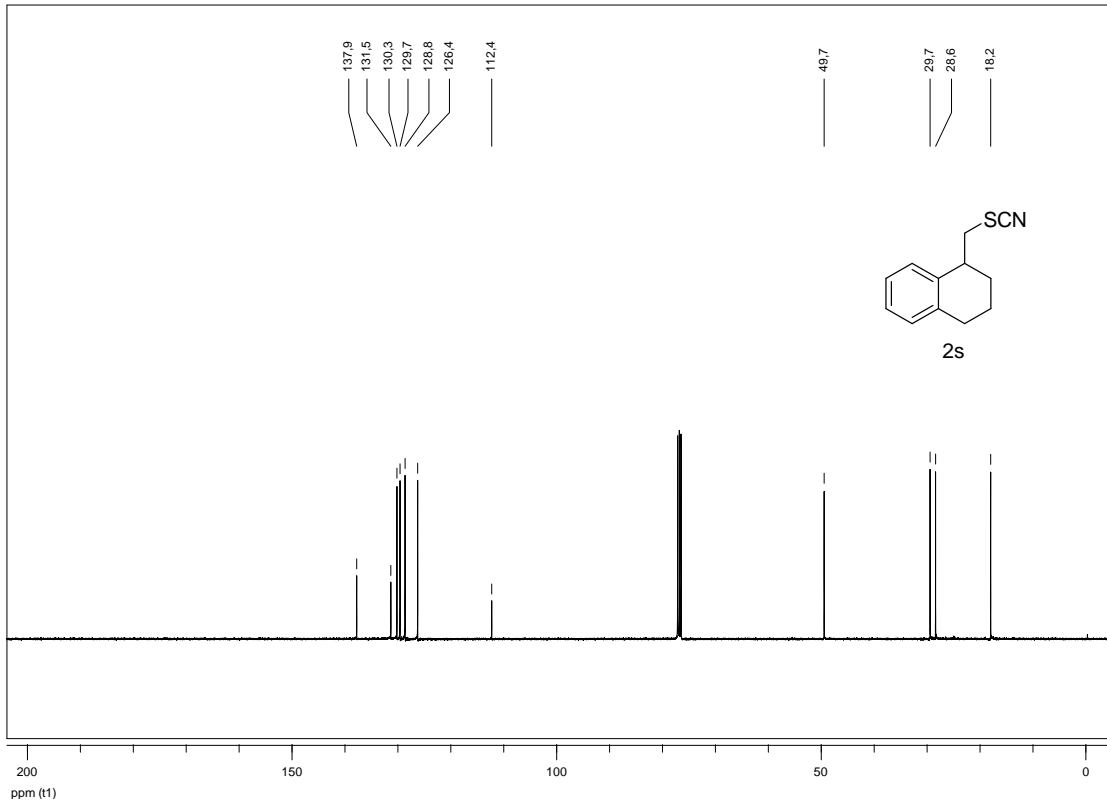

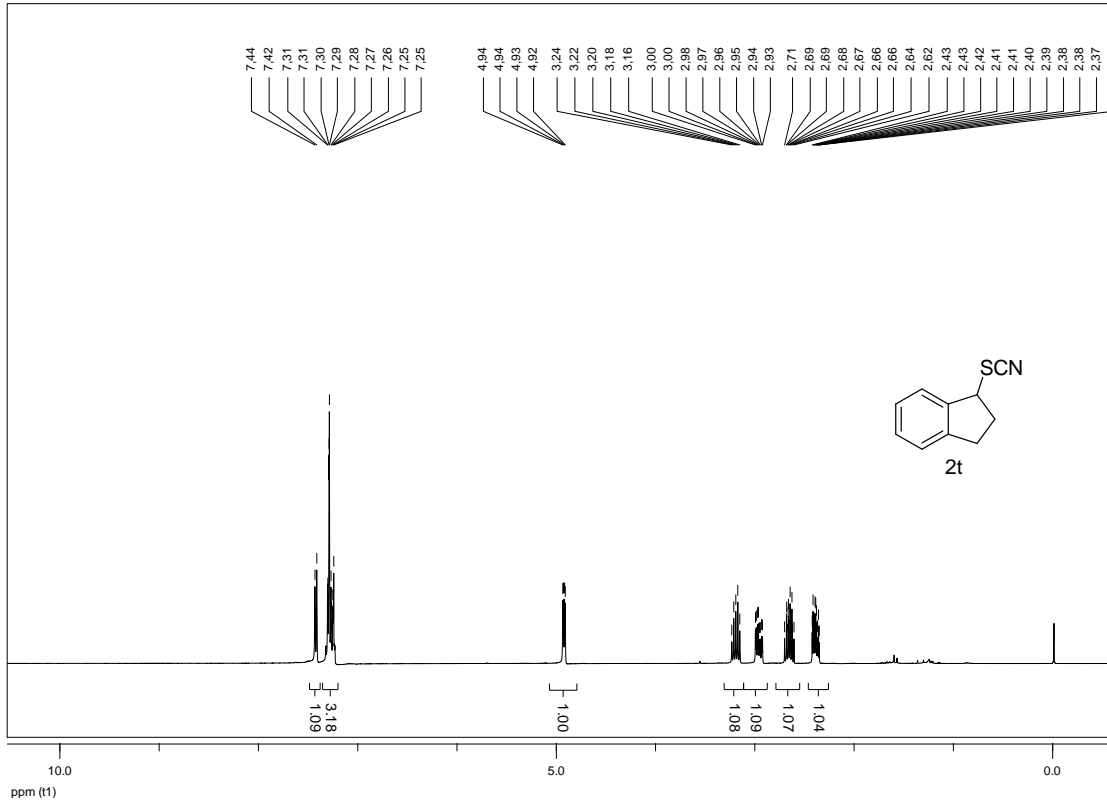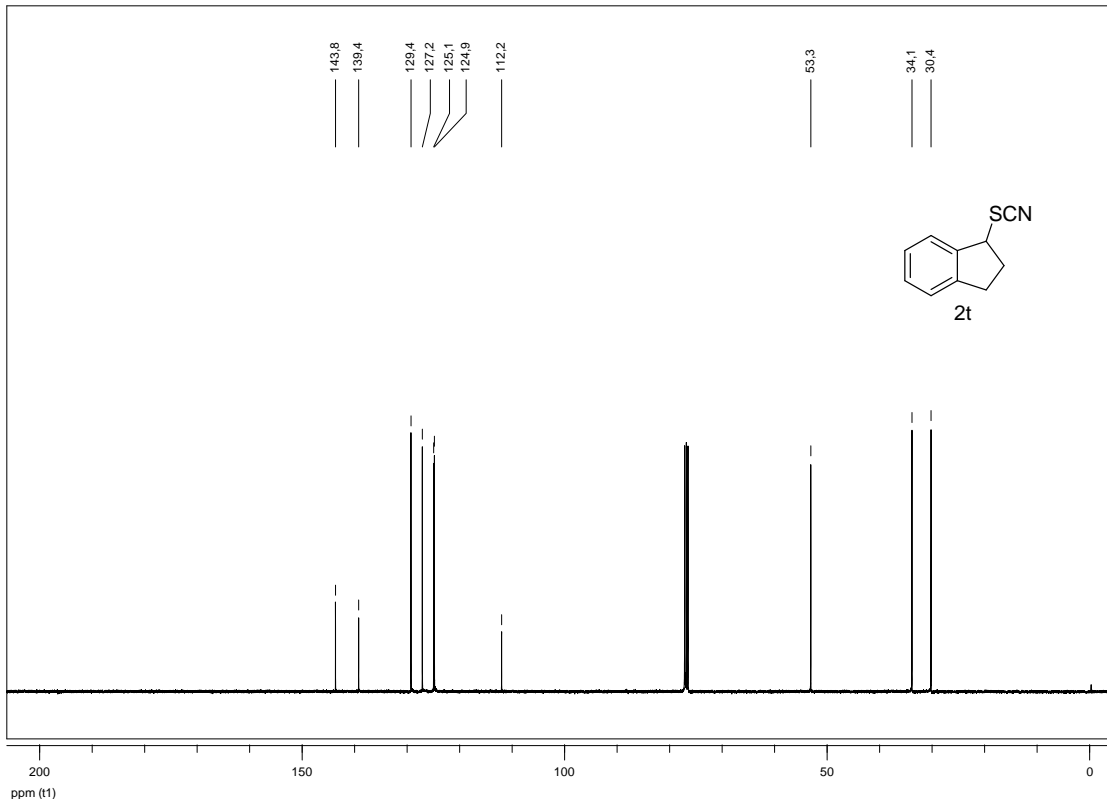

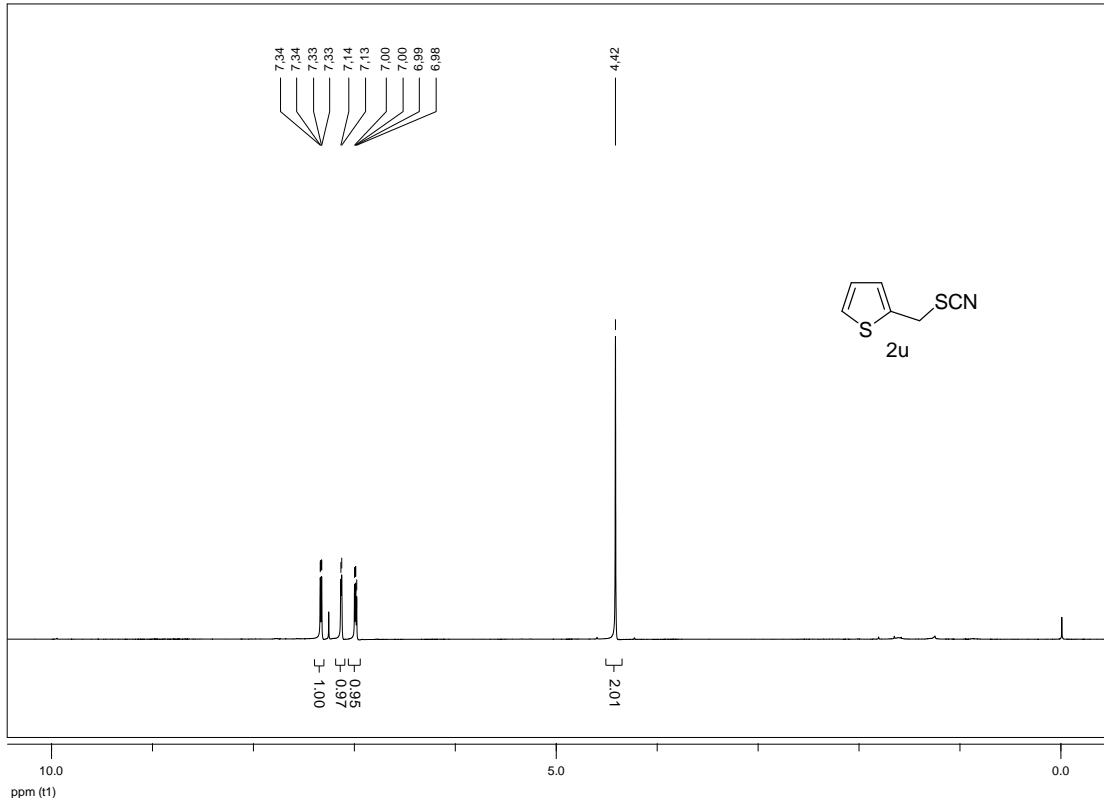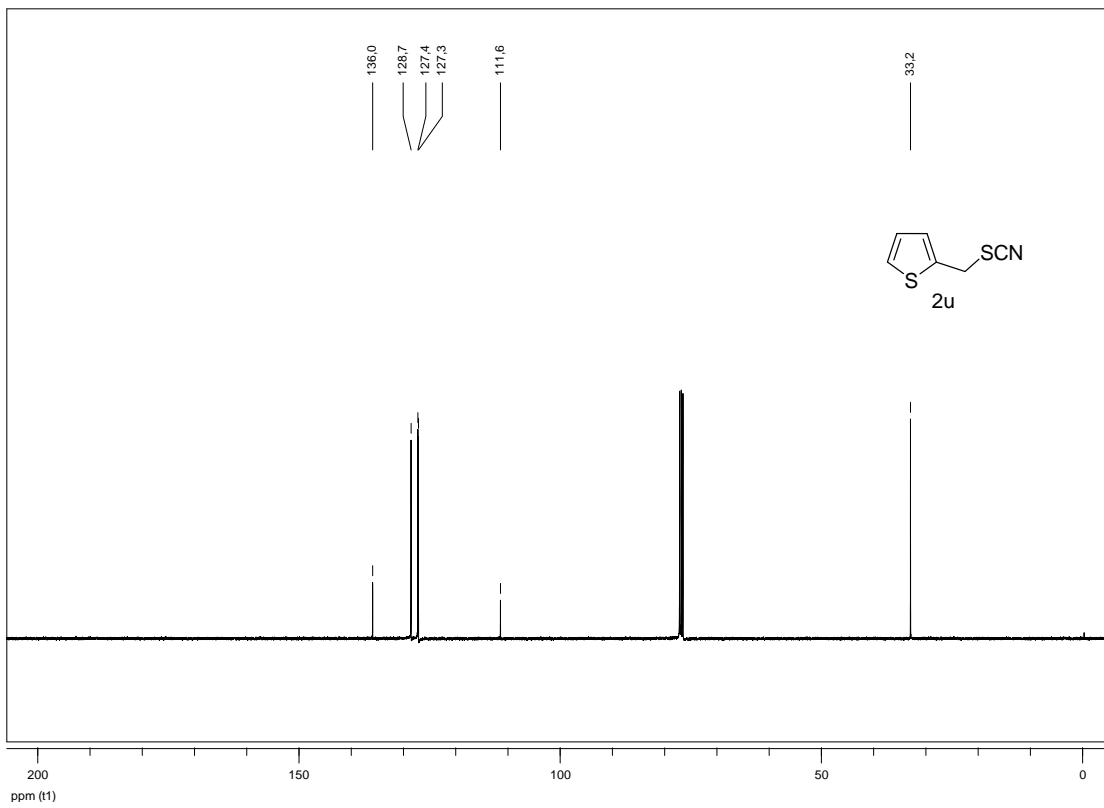

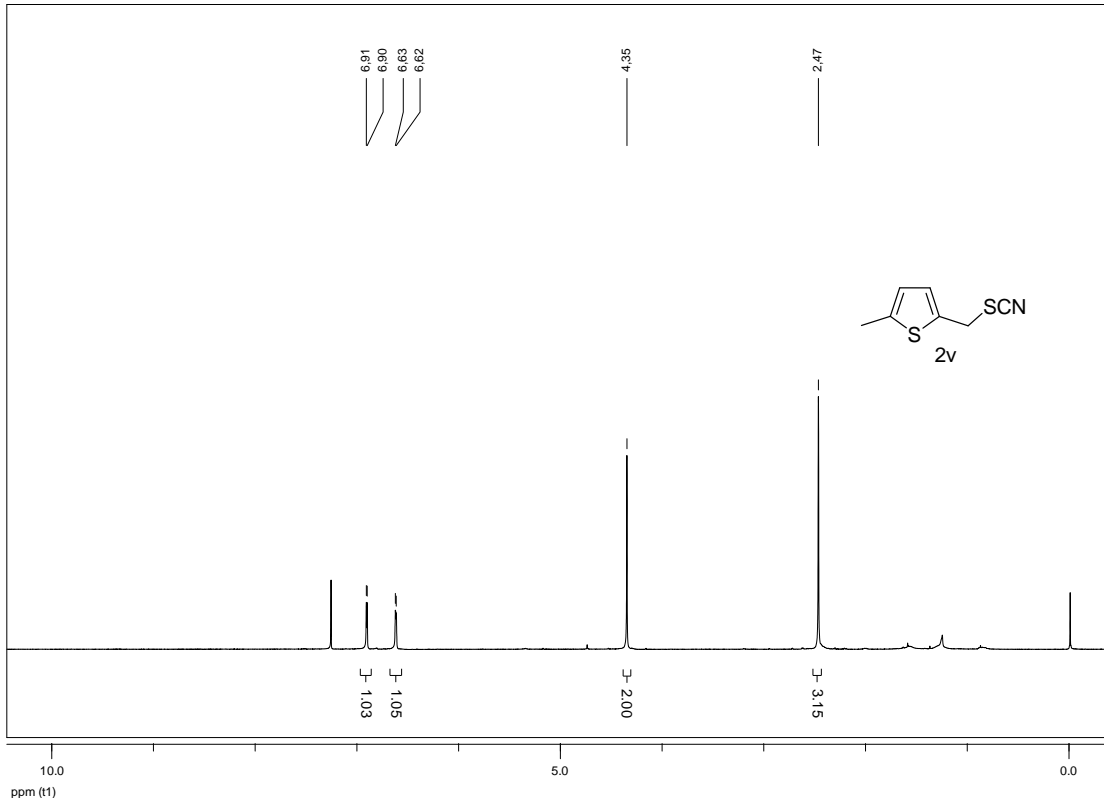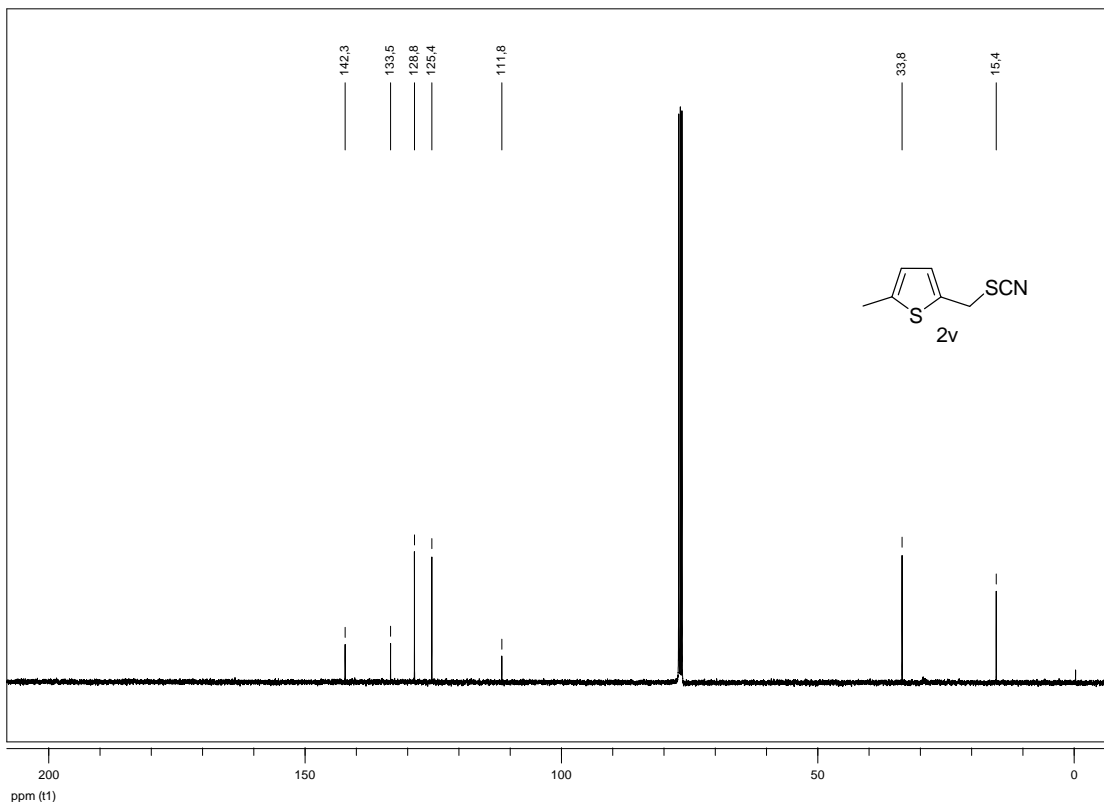

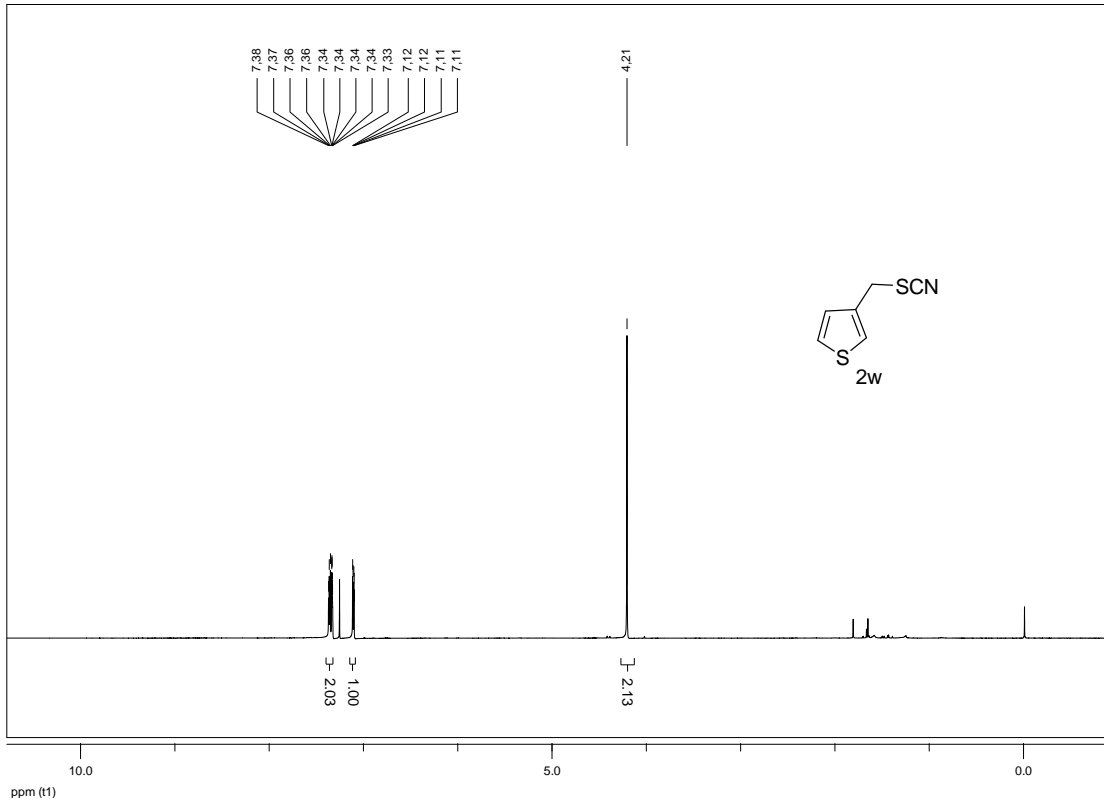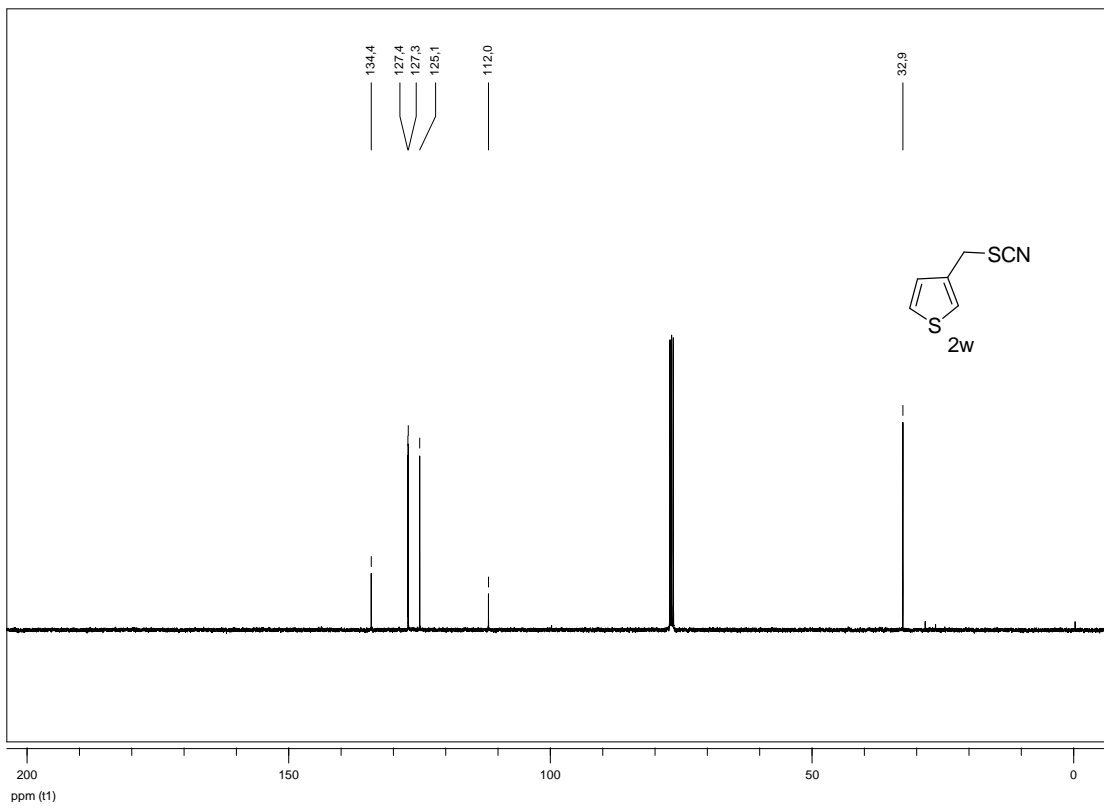



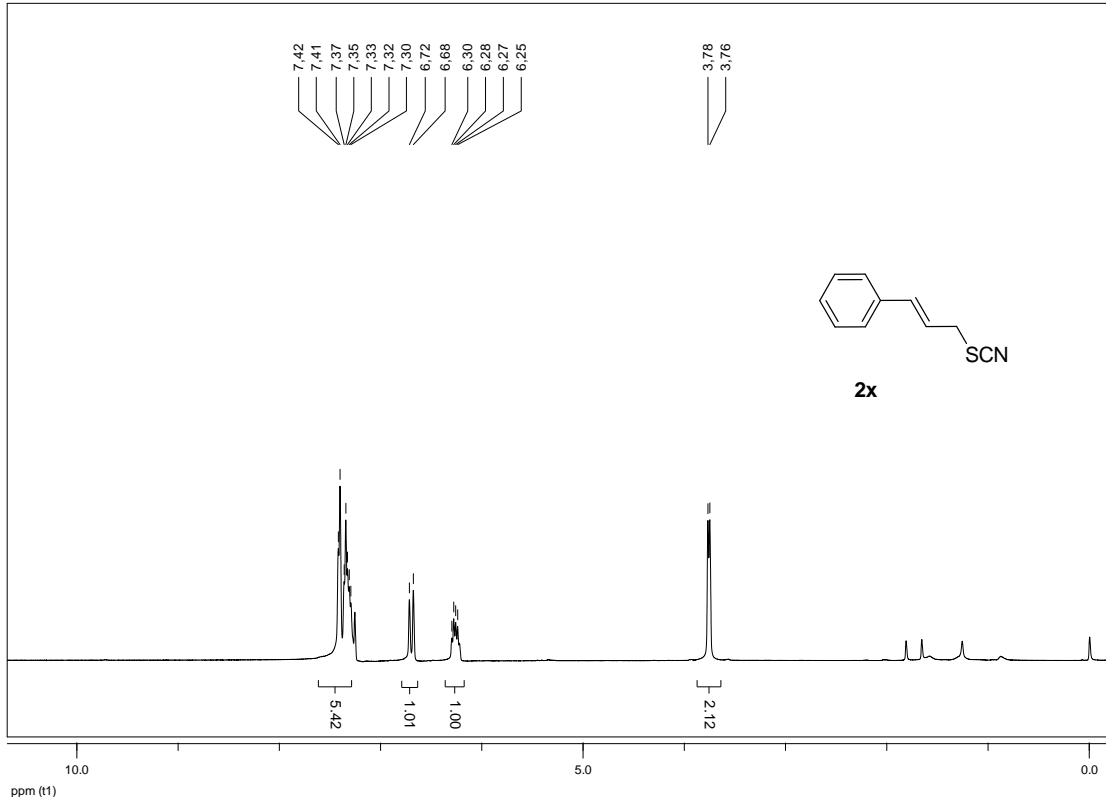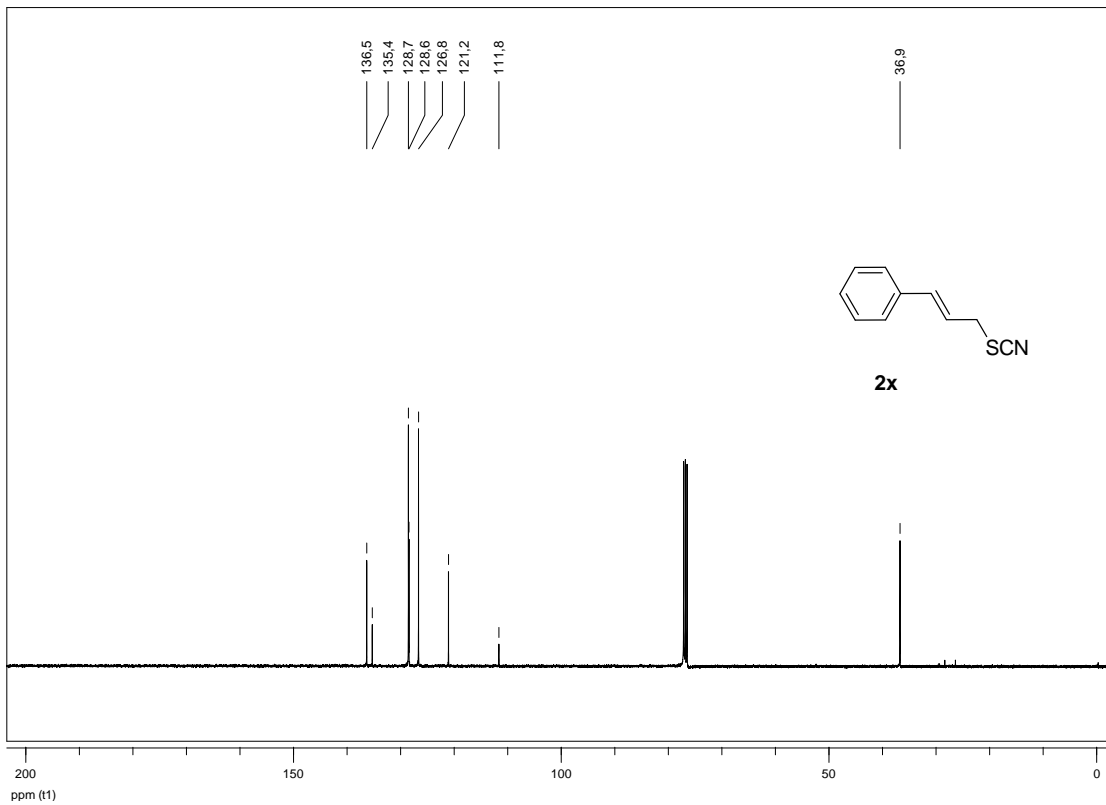

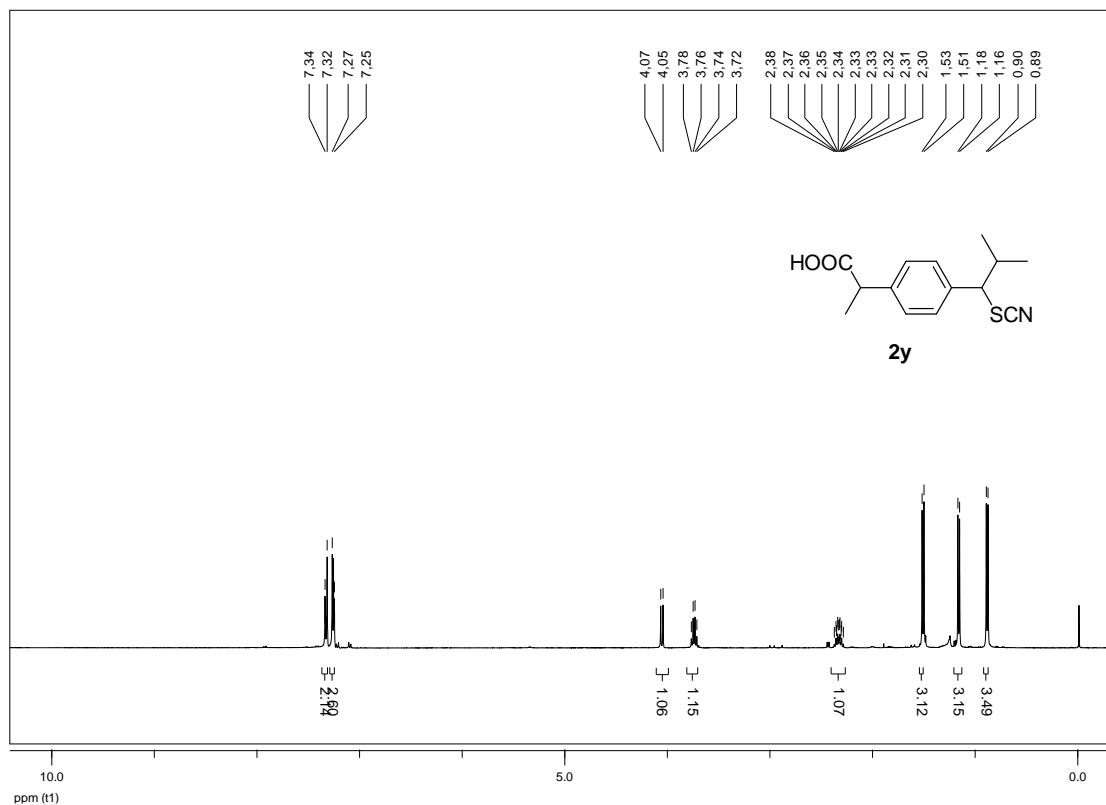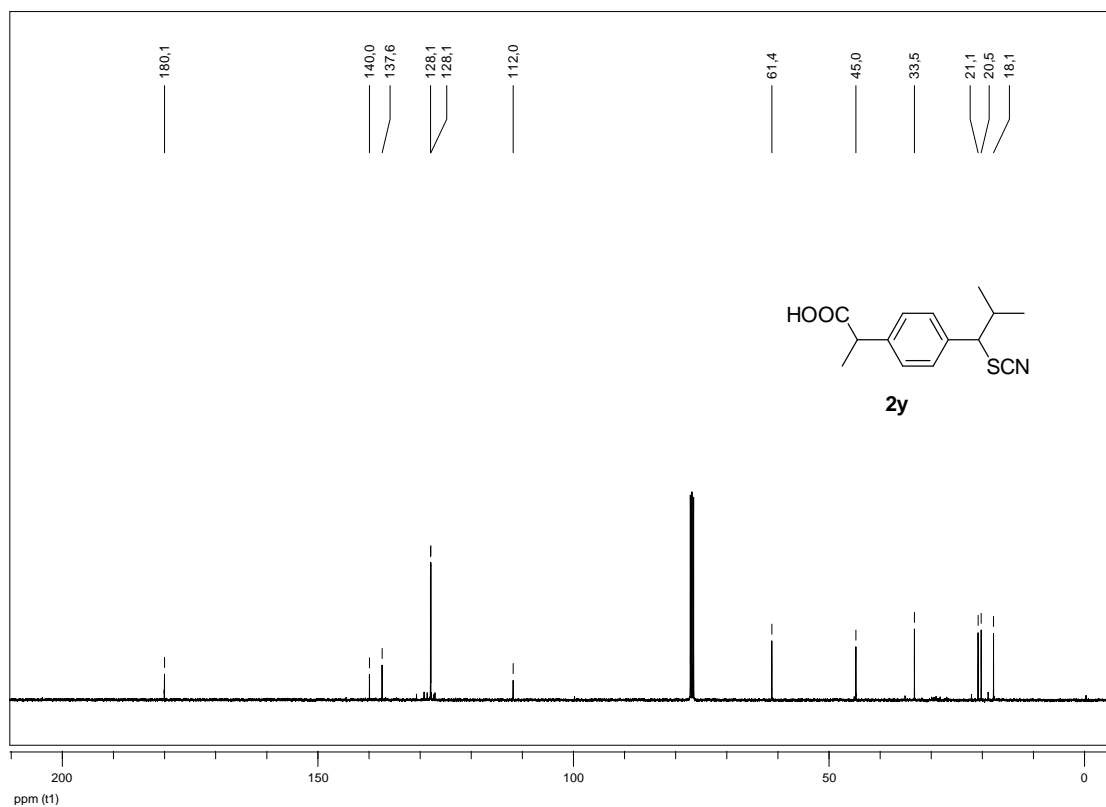

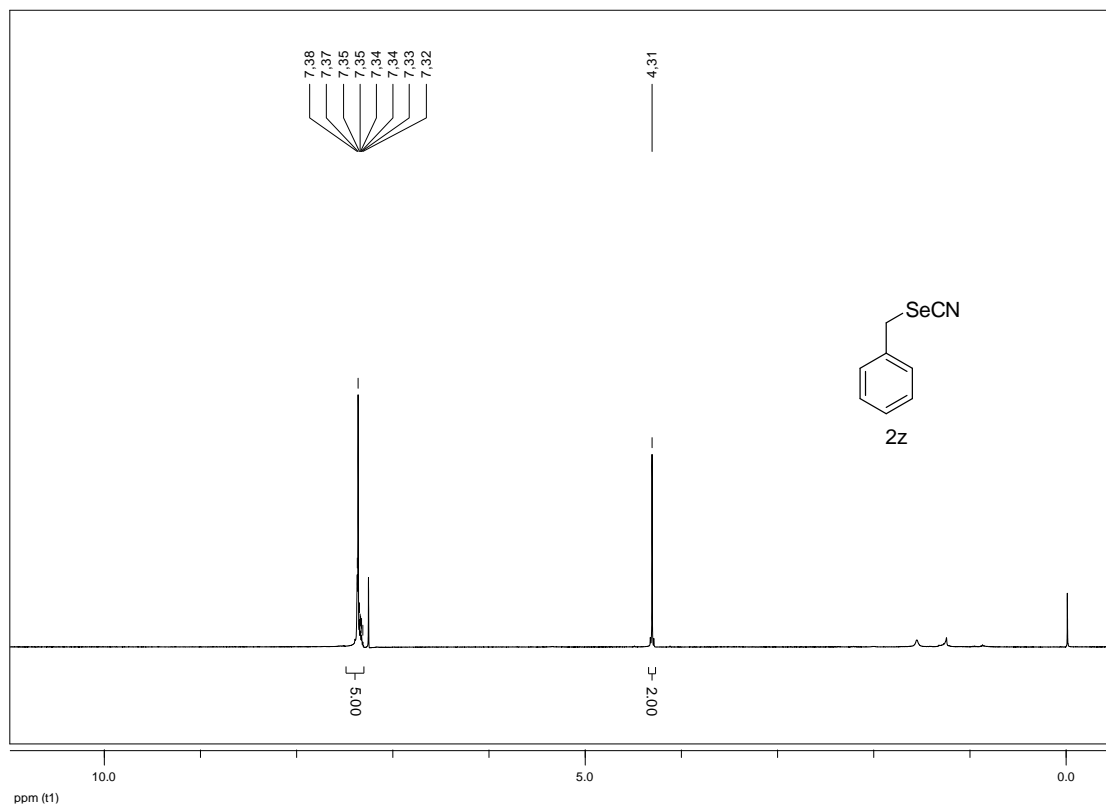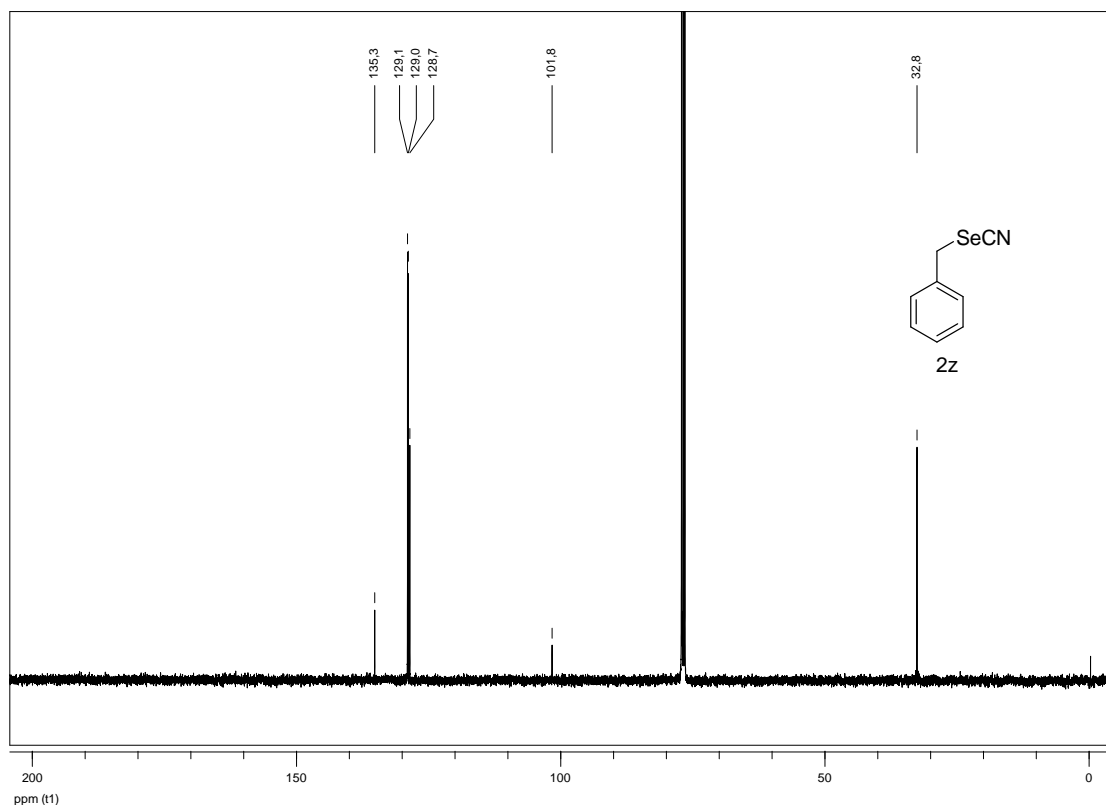

Supplement: d1cc04302a1.pdf [file d1cc04302a1.pdf]
